# Supplementary material for: SMARTphone and social media-based Cardiac Rehabilitation and Secondary Prevention (SMART-CR/SP) for patients with coronary heart disease in China: a randomised controlled trial protocol
Source: PubMed Central journal article supplement — BMJ Open. 2018 Jun 30;8(6):e021908. doi: 10.1136/bmjopen-2018-021908 (PMC6042601; doi:10.1136/bmjopen-2018-021908), 2018-06-30
Supplement: bmjopen-2018-021908.draft_revisions.pdf [file bmjopen-2018-021908.draft_revisions.pdf]

# BMJ Open

BMJ Open is committed to open peer review. As part of this commitment we make the peer review history of every article we publish publicly available.

When an article is published we post the peer reviewers' comments and the authors' responses online. We also post the versions of the paper that were used during peer review. These are the versions that the peer review comments apply to.

The versions of the paper that follow are the versions that were submitted during the peer review process. They are not the versions of record or the final published versions. They should not be cited or distributed as the published version of this manuscript.

BMJ Open is an open access journal and the full, final, typeset and author-corrected version of record of the manuscript is available on our site with no access controls, subscription charges or pay-per-view fees (<http://bmjopen.bmj.com>).

If you have any questions on BMJ Open's open peer review process please email [info.bmjopen@bmj.com](mailto:info.bmjopen@bmj.com)

# BMJ Open

## SMARTphone and social media-based Cardiac Rehabilitation and Secondary Prevention (SMART-CR/SP) for patients with coronary heart disease in China: a randomised controlled trial protocol

|                               |                                                                                                                                                                                                                                                                                                                                                                                                                                                                                                                                                                                                                                                                                                                                                                                                                                                                                                                                                                                                             |
|-------------------------------|-------------------------------------------------------------------------------------------------------------------------------------------------------------------------------------------------------------------------------------------------------------------------------------------------------------------------------------------------------------------------------------------------------------------------------------------------------------------------------------------------------------------------------------------------------------------------------------------------------------------------------------------------------------------------------------------------------------------------------------------------------------------------------------------------------------------------------------------------------------------------------------------------------------------------------------------------------------------------------------------------------------|
| Journal:                      | <i>BMJ Open</i>                                                                                                                                                                                                                                                                                                                                                                                                                                                                                                                                                                                                                                                                                                                                                                                                                                                                                                                                                                                             |
| Manuscript ID                 | bmjopen-2018-021908                                                                                                                                                                                                                                                                                                                                                                                                                                                                                                                                                                                                                                                                                                                                                                                                                                                                                                                                                                                         |
| Article Type:                 | Protocol                                                                                                                                                                                                                                                                                                                                                                                                                                                                                                                                                                                                                                                                                                                                                                                                                                                                                                                                                                                                    |
| Date Submitted by the Author: | 25-Jan-2018                                                                                                                                                                                                                                                                                                                                                                                                                                                                                                                                                                                                                                                                                                                                                                                                                                                                                                                                                                                                 |
| Complete List of Authors:     | Dorje, Tashi; Curtin University - Perth City Campus, Physiotherapy and Exercise Science<br>Zhao, Gang; 2. Department of Cardiology, Fudan University Zhongshan Hospital, Shanghai, China<br>Scheer, Anna ; 1. School of Physiotherapy and Exercise Science, Curtin University, Perth, Australia<br>Tsokey, Lhamo ; 2. Department of Cardiology, Fudan University Zhongshan Hospital, Shanghai, China<br>Wang, Jing; 2. Department of Cardiology, Fudan University Zhongshan Hospital, Shanghai, China<br>Chen, Yaolin; 2. Department of Cardiology, Fudan University Zhongshan Hospital, Shanghai, China<br>Tso, Khandro; 4. Internal Medicine Department, Qilian County Hospital, Qinghai, China<br>Tan, B-K; 5. Allied Health Department, Armadale Health Service, Perth, Australia<br>Ge, Junbo; 2. Department of Cardiology, Fudan University Zhongshan Hospital, Shanghai, China Shanghai, CN<br>Maiorana, Andrew; Curtin University - Perth City Campus, School of Physiotherapy and Exercise Science |
| Keywords:                     | Coronary heart disease < CARDIOLOGY, cardiac rehabilitation, secondary prevention, social media, WeChat                                                                                                                                                                                                                                                                                                                                                                                                                                                                                                                                                                                                                                                                                                                                                                                                                                                                                                     |
|                               |                                                                                                                                                                                                                                                                                                                                                                                                                                                                                                                                                                                                                                                                                                                                                                                                                                                                                                                                                                                                             |

SCHOLARONE™  
Manuscripts

**Title:** SMARTphone and social media-based Cardiac Rehabilitation and Secondary Prevention (SMART-CR/SP) for patients with coronary heart disease in China: a randomised controlled trial protocol

**Authors:** Tashi Dorje<sup>1</sup>, Gang Zhao<sup>2</sup>, Anna Scheer<sup>1</sup>, Lhamo Tsokey<sup>2</sup>, Jing Wang<sup>2</sup>, Yaolin Chen<sup>2</sup>, Khandro Tso<sup>4</sup>, B-K Tan<sup>1,5</sup>, Junbo Ge<sup>2</sup>, Andrew Maiorana<sup>1,3</sup>

**Affiliations:**

1. School of Physiotherapy and Exercise Science, Curtin University, Perth, Australia
2. Department of Cardiology, Fudan University Zhongshan Hospital, Shanghai, China
3. Allied Health Department and Advanced Heart Failure and Cardiac Transplant Service Fiona Stanley Hospital, Perth, Australia
4. Internal Medicine Department, Qilian County Hospital, Qinghai, China
5. Allied Health Department, Armadale Health Service, Perth, Australia

**Corresponding author**

Associate Professor Andrew Maiorana

School of Physiotherapy Exercise Science, Curtin University, Perth, Australia

Email: [A.Maiorana@curtin.edu.au](mailto:A.Maiorana@curtin.edu.au)

Phone number: +61 8 9266 9225

Fax number: +61 8 9266 2605

**Word Count:** 5445 (including title page, abstract, references, figures and tables)

**Number of tables and figures:** 5

## ABSTRACT

**Introduction:** The burden of cardiovascular disease (CVD) is rapidly increasing in developing countries, however access to cardiac rehabilitation and secondary prevention (CR/SP) in these countries is limited. Alternative delivery models that are low-cost and easy to access are urgently needed to address this service gap. The objective of this study is to investigate whether a smartphone and social media-based (WeChat) home CR/SP program can facilitate risk factor monitoring and modification to improve disease self-management and health outcomes in patients with coronary heart disease (CHD) after percutaneous coronary intervention (PCI) therapy.

**Methods and analysis:** We propose a single-blind, randomised controlled trial of 300 post-PCI patients with follow-up over 12 months. The intervention group will receive a smartphone and WeChat-based CR/SP program providing education and support for risk factor monitoring and modification. SMART-CR/SP incorporates core components of modern CR/SP: physical activity tracking with interactive feedback and goal setting; education modules addressing CHD understanding and self-management; remote blood pressure monitoring and strategies to improve medication adherence. Furthermore, a dedicated data portal and a CR/SP coach will facilitate individualised supervision and counselling. The control group will receive usual care but no formal CR/SP program. The primary outcome is change in exercise capacity measured by six-minute walk test distance. Secondary outcomes include knowledge and awareness of CHD, risk factor status, medication adherence, psychological well-being and quality of life, major cardiovascular events, re-hospitalisations and all-cause mortality. To assess the feasibility and patients' acceptance of the intervention, a process evaluation will be performed at the conclusion of the study.

1  
2  
3  
4  
5 **Ethics and dissemination:** Ethics approval was granted by both the Human Research Ethics  
6  
7 Committee of Fudan University Zhongshan Hospital [HREC B2016-058] and Curtin  
8  
9 University Human Research Ethics Office [HRE2016-0120]. Results will be disseminated via  
10  
11 peer-reviewed publications and presentations at conferences.  
12

13 **Clinical Trials registration number** ChiCTR-INR-16009598  
14

15 **Key words:** coronary heart disease, cardiac rehabilitation, secondary prevention, social  
16  
17 media  
18

19  
20 **Word count:** 252  
21  
22  
23  
24  
25  
26  
27  
28  
29  
30  
31  
32  
33  
34  
35  
36  
37  
38  
39  
40  
41  
42  
43  
44  
45  
46  
47  
48  
49  
50  
51  
52  
53  
54  
55  
56  
57  
58  
59  
60

## STRENGTHS AND LIMITATIONS OF THE STUDY

- We propose an innovative social media-based CR/SP program to deliver community-based support for patients with CHD, after hospitalisation for PCI therapy. WeChat, a highly utilised social media application in China, will be employed to deliver a home CR/SP program to support risk factor modification and monitoring of patients with CHD. The system will enable bi-directional communication between patients and the CR/SP provider, reflecting conventional practice. To our knowledge, this will be the first study to evaluate a CR/SP program provided exclusively via social media.
- To inform the design of the intervention, end-user surveys and focus group discussions were undertaken to identify patients' needs related to CR/SP.
- This will be a single-centre study, which may limit the generalisation and application of the study results to a broader population. However, the large geographic, cultural and socioeconomic diversity of patients admitted at the study hospital may help to reduce this potential bias.
- This paper describes the rationale and protocol for a single-centre randomised controlled trial of smartphone and WeChat-based home CR/SP for patients with CHD following PCI therapy.

## INTRODUCTION

The rapid economic growth and industrialisation of China over the past three decades has been paralleled by a growing epidemic of coronary heart disease (CHD). It is estimated there are over 11 million Chinese people with this disease, a figure expected to increase steadily in the next few decades.<sup>1-3</sup> In 2015, over 560,000 cases of percutaneous coronary intervention (PCI), a common treatment for CHD, were performed in mainland China.<sup>1</sup> People with established CHD are at high risk of recurrent cardiac events<sup>4</sup> which place a significant burden on healthcare services. However, these events can be reduced by up to half with effective secondary prevention, such as adherence to cardio-protective medication and lifestyle modification.<sup>5</sup>

Cardiac rehabilitation and secondary prevention (CR/SP) are systematic, evidence-based processes that facilitate the delivery of preventive therapies and improve patient outcomes after a cardiovascular event. Participation in CR/SP programs can reduce mortality by up to 25%, improve quality of life and reduce cardiovascular risk factor burden.<sup>6-8</sup> However, despite the well-established benefits, CR/SP services are still grossly underutilised globally. Data from developed countries, such as the United States and Australia, reported patient participation rates of between 30% and 45%, with high dropout rates of between 40% and 55%.<sup>9-13</sup> In low and middle income countries (LMICs), access to CR/SP services remains very low, with less than a quarter of countries having CR/SP programs.<sup>14 15</sup> In China, despite recent advances in the medical management of CHD, very few patients currently receive CR/SP services.<sup>16 17</sup> This may be due in part to the challenges associated with establishing traditional models of CR/SP in the Chinese healthcare environment, such as the lack of specific funding, staff education and training, reimbursements for participating patients.<sup>16-18</sup>

1  
2  
3 Accordingly, there is a need for innovative strategies to implement this evidence-based  
4 therapy in China.  
5  
6  
7

8  
9 Internet and smartphone-based interventions have recently been shown to be effective  
10 alternative methods for delivering rehabilitation and secondary prevention programs for  
11 people with CHD.<sup>19-22</sup> The rapid increase in smartphone and social media users in China has  
12 created a strong platform for the delivery of CR/SP services via these media. For example, it  
13 is reported that there are over 800 million active users of WeChat, a popular social media site  
14 in China.<sup>23</sup> However, there are currently no studies that have examined the feasibility and  
15 efficacy of utilising smartphones and social media to provide rehabilitation and secondary  
16 prevention services for the Chinese population. A recent study that used WeChat to support  
17 weight loss has shown positive results. In this study, participants who were more active in the  
18 WeChat-based weight loss program lost more weight, highlighting that social media may  
19 offer a promising new approach to managing chronic health conditions.<sup>24</sup>  
20  
21  
22  
23  
24  
25  
26  
27  
28  
29  
30  
31  
32  
33  
34

35 It is in this context that we have developed the smartphone and WeChat-based home cardiac  
36 rehabilitation and secondary prevention (SMART-CR/SP) study.  
37  
38  
39  
40

## 41 **METHODS AND ANALYSIS**

### 42 **Study Design**

43  
44 SMART-CR/SP will be a single-blind, two-arm, parallel, randomised controlled trial to  
45 evaluate the effects of CR/SP delivered via smartphone and WeChat on patient exercise  
46 capacity, knowledge and awareness of the disease, medication adherence, blood pressure,  
47 lipid profile, quality of life and clinical outcomes (Figure 1). The protocol conforms to the  
48  
49  
50  
51  
52  
53  
54  
55  
56  
57  
58  
59  
60



1  
2  
3 SPIRIT 2013 statement and the intervention is described in accordance with the CONSORT-  
4 EHEALTH checklist.<sup>25-27</sup>  
5  
6  
7  
8

### 9 **Eligibility and recruitment**

10 Patients between the ages of 18-70 years with a diagnosis of CHD, including myocardial  
11 infarction, unstable or stable angina, who are treated with PCI therapy during their current  
12 admission will be eligible for inclusion. All participants will be required to personally own an  
13 operational smartphone, have an active WeChat account and sufficient Chinese language  
14 proficiency.  
15  
16  
17  
18  
19  
20  
21  
22

23  
24 Exclusion criteria include: contra-indications to exercise rehabilitation (e.g. untreated  
25 ventricular tachycardia, severe heart failure, uncontrolled hypertension or hypotension,  
26 significant exercise limitations), an inability to operate a smartphone for the purpose of the  
27 trial (e.g. vision, hearing, cognitive or dexterity impairment), lack of internet access at place  
28 of residence, or having pre-existing comorbid disease with a life expectancy of less than one  
29 year.  
30  
31  
32  
33  
34  
35  
36  
37

38 Recruitment will occur during hospital admission at Fudan University Zhongshan Hospital in  
39 Shanghai. The hospital is a preeminent public hospital in Eastern China, servicing a culturally  
40 and socioeconomically diverse population from across the nation. Patients admitted with  
41 CHD, and who receive PCI therapy during their admission, will be screened and those  
42 meeting the inclusion criteria will be invited to participate in the study. A face-to-face  
43 interview will be arranged for patients who express an interest in the trial, and formal written  
44 consent will be obtained from candidates who agree to participate.  
45  
46  
47  
48  
49  
50  
51  
52  
53

### 54 **Sample size calculation**

1  
2  
3 A 25 metre improvement in the six-minute walk test (6MWT) is considered to be clinically  
4 meaningful.<sup>28-30</sup> Thus, to detect a minimal clinically important difference of 25 meters for the  
5 6MWT with 90% power (type I error = 5%, two-sided test), we will require a total sample  
6 size of 242 across both arms of the study. Assuming, an estimated 20% loss to follow-up, we  
7 plan to recruit a total of 300 participants.  
8  
9  
10  
11  
12

### 13 14 **Ethics approval**

15  
16  
17 Primary ethics approval for this trial was granted by the Human Research Ethics Committee  
18 of Fudan University Zhongshan Hospital [HREC B2016-058]. The Curtin University Human  
19 Research Ethics Office granted the reciprocal approval for the trial [HRE2016-0120].  
20  
21  
22  
23

### 24 25 **Randomisation and blinding**

26  
27  
28 Following provision of consent, participants will be randomised in a 1:1 fashion to a  
29 smartphone and WeChat-based cardiac rehabilitation and secondary prevention program  
30 (SMART-CR/SP) group, or a usual care group by using the random allocation sequences  
31 generated from SAS software (SAS Institute Inc., Cary, NC, USA). The SMART-CR/SP  
32 program will be initiated within two weeks of participant discharge following PCI therapy.  
33  
34 Participants will be informed of their group allocation through a single WeChat message.  
35  
36 Additionally, participants in the intervention group will receive their first cartoon-format  
37 WeChat article, illustrating the SMART-CR/SP program, to familiarise them with the system  
38 and mobile technologies involved. Additional technology training will be provided if required  
39 by the participant. Research personnel involved in participants' assessments be blinded to  
40 treatment allocation.  
41  
42  
43  
44  
45  
46  
47  
48  
49  
50  
51

### 52 53 **Control (usual care) group**

1  
2  
3 Participants in the usual care group will receive standard care as provided by their community  
4 doctors and cardiologists after hospital discharge. In China, current post-PCI care involves  
5 brief inpatient health education provided by a ward nurse, medication management and ad  
6 hoc follow-up visits to a cardiologist or other health care providers according to the patient's  
7 self -assessment of their own cardiovascular health.  
8  
9  
10  
11  
12

### 13 14 **Intervention group**

15  
16  
17 In addition to usual care, participants in the SMART-CR/SP group will receive an eight week  
18 comprehensive smartphone and WeChat-based home CR/SP program providing core  
19 components of guideline advocated CR/SP for post-PCI CHD patients,<sup>31 32</sup> followed by a 16-  
20 week 'step-down' program. Figure 2 provides a pictorial representation of the interactive  
21 system.  
22  
23  
24  
25  
26  
27

### 28 29 **Cardiac health education**

30  
31  
32 A culturally appropriate and user-friendly WeChat-based cardiac health education system has  
33 been developed for this trial, which consists of 32 episodes of cartoon-format CHD  
34 educational articles, covering a broad range of cardiovascular health education topics relevant  
35 to post-PCI CHD patients (Figure 3). In the first eight weeks, participants will receive four  
36 WeChat educational articles per week. Each of the articles will introduce one key educational  
37 topic using a short interactive story involving dialogue between a patient and cardiologist  
38 avatar that is illustrated by 20-30 cartoon drawing slides. In the 'step-down' program, two  
39 cartoon drawing slides with a key motivational message attached to each will be sent to  
40 participants' WeChat account every week. The WeChat articles/slides and messages will be  
41 sent during random working hours on random weekdays from an official WeChat account  
42 (avatar name: Dr. Kang: an abbreviation of "rehabilitation" in Chinese). Table 1 shows the  
43 content of the cardiac health education.  
44  
45  
46  
47  
48  
49  
50  
51  
52  
53  
54  
55  
56  
57

### **Role of the CR/SP coach**

A cardiologist will act as the CR/SP coach, whose main task is to review participants' data on a regular basis and provide guidance and medical advice as required. All questions and enquiries from participants will be reviewed and replied to by the CR/SP coach using the study's official WeChat account (Dr Kang). Replies will be made within one business day, and video calls will be booked if required by the participants.

### **Exercise prescription and physical activity tracking**

Participants will receive an individualised walking program based on their baseline 6MWT, with both the time and intensity of walking increased gradually over the first eight weeks. The target physical activity level will be 10,000 accumulated steps of walking per day, at least five times per week, in accordance with international recommendations.<sup>33</sup> Utilising WeChat's physical activity tracker, WeChat Sports, participants will be able to review their real-time, weekly and monthly step counts. The CR/SP coach, as a WeChat 'friend' of the participant, will have access to their step counts and will review participants' physical activity data on a weekly basis, provide guidance and positive reinforcement on days that target physical activity levels are achieved. Participants will also be encouraged to undertake other forms of physical activity, such as swimming, Tai Chi, group dancing and table tennis.

### **Blood pressure monitoring and management**

Participants will be provided with a Bluetooth enabled blood pressure monitoring device (C-health XY-10, Sky Innovation Technology Ltd. (Shanghai)), and will be asked to measure their blood pressure on two days per week, with two measurements each day, one minute apart. The blood pressure readings will be transmitted via Bluetooth technology to a dedicated application on participants' smartphones where it will be uploaded to a data

1  
2  
3 management portal which will be reviewed by the CR/SP and appropriate guidance will be  
4 provided to participants according to contemporary guidelines.<sup>34</sup> A standard procedure and  
5 alerts will be employed when participant's measurement readings are outside the target levels.  
6  
7 This will include WeChat alert messages send by the CR/SP coach to remind participants for  
8 repeat blood pressure measurements, medication adherence and to seek medical advice from  
9 their health care givers if indicated. WeChat-based counselling will be provided if participant  
10 prefers to receive advice from the CR/SP coach. This alert system will be ceased once the  
11 target blood pressure is achieved. To facilitate the ability of both the participants and the  
12 CR/SP coach to review the blood pressure data, blood pressure management applications will  
13 be installed on both participants' and physician's smartphone.  
14  
15  
16  
17  
18  
19  
20  
21  
22  
23  
24

### 25 **Cardiovascular risk factor monitoring and management**

26  
27  
28 Cardiovascular risk factors for each participant will be assessed during the baseline face-to-  
29 face assessment. This will involve a detailed review of the participant's PCI therapy, blood  
30 pressure, family history of CVD, glucose levels, lipid profile, smoking status, body mass  
31 index (BMI), hip and waist circumferences, dietary habit, existing sleep apnoea, and diabetes.  
32  
33 Data will be collected and managed using the REDCap electronic data capture tool hosted at  
34 Fudan University.<sup>35</sup> After the initial assessment, participants will be informed of their target  
35 level for each risk factor by the CR/SP coach, and encouraged to try and achieve this goal.  
36  
37 Participants can update their CVD risk factor profile at any time through communication with  
38 the CR/SP coach on WeChat.  
39  
40  
41  
42  
43  
44  
45  
46  
47

### 48 **Healthy nutrition**

49  
50  
51 To help participants understand and comply with dietary recommendations, cartoon-format  
52 educational articles developed according to contemporary guidelines<sup>36-38</sup> will be sent to their  
53 WeChat account. Cultural considerations have been taken into account when developing the  
54  
55  
56  
57

1  
2  
3 dietary content of the educational articles. In addition, participants will be able to photograph  
4 the food they consume and send the pictures to the CR-SP coach through WeChat to get  
5 feedback on the nutritional content of the food.  
6  
7  
8  
9

### 10 **Cardiac medication management**

11  
12 The medication list of each participant will be reviewed by the CR/SP coach at baseline to  
13 ensure that the five classes of recommended cardio-protective medications have been  
14 prescribed (aspirin, adenosine diphosphate (ADP) receptor antagonist, beta-blocker,  
15 angiotensin-converting-enzyme (ACE) inhibitor or angiotensin II receptor blockers (ARBs),  
16 and a statin/ lipid-lowering medication). If any of the cardio-protective medications are not  
17 prescribed for the participant then underlying reasons (contraindicated/previously  
18 documented intolerance) will be investigated. The participant will be notified and encouraged  
19 by the CR/SP coach to discuss their medication therapy with their doctors if they are not  
20 prescribed with these medications without justification. Additionally, information relating to  
21 the mechanism of these drugs, evidence of clinical benefits, and common side effects will be  
22 described in detail in the WeChat cartoon-format educational articles to increase  
23 understanding and compliance rates.  
24  
25  
26  
27  
28  
29  
30  
31  
32  
33  
34  
35  
36  
37  
38  
39

### 40 **Outcome assessment**

41  
42 The outcome measures for the trial are outlined in Table 2. Baseline assessments will occur  
43 within two weeks of participants' discharge from hospital, with follow up at eight weeks, six  
44 months and 12 months to evaluate both the short-term and longer-term efficacy of the CR/SP  
45 intervention. The primary outcome will be the change in exercise capacity from baseline, as  
46 assessed by 6MWT distance at eight weeks and six months, using a standardised protocol.<sup>39</sup>  
47  
48 In the 6MWT, oxygen saturation, blood pressure, and heart rate of participants will be  
49 measured pre- and post-test.  
50  
51  
52  
53  
54  
55  
56  
57  
58  
59  
60

1  
2  
3 Secondary outcomes will be participant knowledge of CHD, evaluated by a CHD knowledge  
4 questionnaire based on two validated heart disease questionnaires,<sup>40 41</sup> resting blood pressure,  
5 fasting plasma glucose and cholesterol levels, adherence to cardio-protective medications,  
6 behavioural CHD risk factors including unhealthy diet (WHO Steps instrument);<sup>42</sup> smoking  
7 (Fagerström Test for Nicotine Dependence);<sup>43</sup> low physical activity (IPAQ), overweight or  
8 obesity, as well as psychosocial factors including anxiety symptoms (Generalized Anxiety  
9 Disorder 7-item scale), depressive symptoms (SF-12 V2™ Health Survey), major  
10 cardiovascular events (MACE), and all-cause mortality.  
11  
12  
13  
14  
15  
16  
17  
18  
19  
20

21 Health system and associated resource use relating to CHD will be collected during each  
22 follow up visit from participants' self-report and cross-checked against hospital records. This  
23 will include: emergency department presentations, hospital admissions, outpatient clinic  
24 attendances, and community doctor and specialist consultations. The cost of resource use  
25 relating to CHD will be valued based on the current manual of resource items and their  
26 associated costs published by the Shanghai Municipal Health and Family Planning  
27 Commission.  
28  
29  
30  
31  
32  
33  
34  
35  
36

### 37 **Evaluation of participants' perceptions of SMART CR/SP**

38  
39 Process evaluation will be undertaken by user surveys and focus group discussions. At the  
40 completion of the trial, participants from the intervention group will be invited to complete a  
41 WeChat-based questionnaire to evaluate their experience and perceptions of the program. A  
42 sub-group of participants from the intervention group will be randomly selected and invited  
43 to participate in focus group discussions, to gain a more in-depth understanding of the end-  
44 users' acceptability of the program, their experiences, and expectations of future smartphone  
45 and social media-based CR/SP models. We anticipate approximately five focus groups will  
46 be required, however, sampling will be ceased once thematic saturation is reached. Focus  
47 groups will be conducted by an experienced researcher (Dr Gang Zhao), digitally recorded  
48  
49  
50  
51  
52  
53  
54  
55  
56  
57  
58  
59  
60

1  
2  
3 and transcribed. Data will be sorted, coded and assigned to categories based on the objectives  
4  
5 via an inductive approach.  
6  
7

### 8 **Statistical considerations**

9

10  
11 The intention to treat principle will be adopted and participants' outcomes will be analysed  
12 according to the group to which they are allocated. Baseline characteristics of the cohort will  
13 be summarised using descriptive statistics. Continuous variables will be reported as mean and  
14 standard deviation and be compared using student's *t* test. Categorical variables will be  
15 described as frequencies and percentages and compared using Chi-square test. Mann-whitney  
16 U test will be used if data are not normally distributed. A Cox proportional hazard model will  
17 be performed to analyse hospital readmission, outpatient clinic and emergency department  
18 visits. The criterion for statistical significance will be set at  $P < 0.05$ . The statistical analysis  
19 will be conducted using SPSSv24 (IBM, USA).  
20  
21  
22  
23  
24  
25  
26  
27  
28  
29  
30  
31

### 32 **DISCUSSION**

33

34  
35 The SMART-CR/SP study will evaluate the feasibility and impact of an innovative  
36 smartphone and WeChat-based home CR/SP program for patients with CHD after PCI  
37 therapy. We are not aware of any previously published studies that have reported the efficacy  
38 of a smartphone and social media CR/SP service delivery model.  
39  
40  
41  
42  
43  
44

45  
46 Cardiac rehabilitation and secondary prevention is a Class I recommendation for the  
47 management of CHD patients.<sup>31</sup> However, despite the growing evidence of its cost-  
48 effectiveness<sup>11</sup> and efficacy in reducing cardiovascular morbidity and mortality,<sup>8</sup> CR/SP  
49 services are limited in China. A recent national survey showed that only 30 of 124 (24%)  
50 large medical centres surveyed in China have operational CR programs, translating to  
51  
52  
53  
54  
55  
56  
57  
58  
59  
60



1  
2  
3 approximately two programs per 100 million inhabitants.<sup>16</sup> To address this service provision  
4 gap, there is a clear need to develop alternative delivery models to increase access to CR/SP  
5 services. Social media offers great potential for delivering health education and support  
6 through smartphones. Compared with past telephone and text message support, smartphones  
7 and social media may provide a more powerful, multi-functional platform for disease  
8 management. This includes access to step counting, multi-media messaging, voice/video call  
9 and group discussion. In China, and other LMICs, where access to tertiary and secondary  
10 prevention health care are often limited, these advanced technology functions may greatly  
11 facilitate the delivery of core components of modern CR/SP to many CHD patients who  
12 would not otherwise have had access to these important services. The potential reach of a  
13 smartphone and social media-based CR/SP intervention is great as it could easily be  
14 expanded to reach many smartphone and social media users at a low cost. Furthermore, this  
15 innovative service model could overcome common barriers to patients participating CR/SP  
16 program, such as inconvenience, geographical isolation and financial burden,<sup>21 22 24</sup> given it  
17 is easy to access, flexibility and low cost.  
18  
19  
20  
21  
22  
23  
24  
25  
26  
27  
28  
29  
30  
31  
32  
33  
34  
35  
36

37 In conclusion, SMART-CR/SP will test the utility of a smartphone and WeChat-based  
38 intervention to deliver the core components of guideline advocated CR/SP. If the efficacy of  
39 this social media-based CR/SP intervention is validated, this will have significant potential to  
40 improve access to evidence-based CR/SP for patients with CHD. This is likely to translate to  
41 improved patient outcomes and reduced financial burden of CVD on health systems.  
42 Although the focus of this study is the delivery of a CR/SP intervention via smartphone and  
43 WeChat, there is great potential that this model of care could be adopted in both the primary  
44 and secondary prevention context for other chronic diseases, and using other social media  
45 platforms.  
46  
47  
48  
49  
50  
51  
52  
53  
54  
55  
56  
57  
58  
59  
60

## COMPETING INTERESTS

We declare that there are no conflicts of interest related to this clinical trial.

## CONSENT FOR PUBLICATION

The manuscript does not contain any individual patient's data in any form.

## FUNDING

This work is funded by TD's PhD scholarship from Curtin University.

All blood pressure monitors were donated by Sky Innovation Technology (Shanghai) Limited, however, no staff from the company will be involved in the design, implementation and data analysis of the study. Significant 'in-kind' support (staff time) was provided by Fudan University Zhongshan Hospital.

## AUTHOR'S CONTRIBUTIONS

TD and AM conceived the original concept of the study and wrote the first draft of the protocol manuscript. ZG, AS, LT, JW, YLC, KT, BKT, JBG contributed to the design of the study. All authors read and approved the final manuscript.

## ETHICS AND DISSEMINATION

The Human Research Ethics Committee of Fudan University Zhongshan Hospital granted the primary ethics approval for the trial [HREC B2016-058]. The Curtin University Human Research Ethics Office granted the reciprocal approval for the trial [HRE2016-0120]. The report of the study will be disseminated via the usual scientific forums including peer-reviewed publications and presentations at national and international conferences.

## REFERENCES

1. Weiwei C, Runlin G, Lisheng L, et al. Outline of the report on cardiovascular diseases in China, 2016. *china journal of circulation* 2017;**32**(6):521-30.
2. Bi Y, Jiang Y, He J, et al. Status of cardiovascular health in Chinese adults. *J Am Coll Cardiol* 2015;**65**(10):1013-25.
3. Moran A, Gu D, Zhao D, et al. Future cardiovascular disease in china: markov model and risk factor scenario projections from the coronary heart disease policy model-china. *Circ Cardiovasc Qual Outcomes* 2010;**3**(3):243-52.
4. Yusuf S. Two decades of progress in preventing vascular disease. *The Lancet* 2002;**360**(9326):2-3.
5. Clark AM, Hartling L, Vandermeer B, et al. Secondary prevention programmes for coronary heart disease: a meta-regression showing the merits of shorter, generalist, primary care-based interventions. *Eur J Cardiovasc Prev Rehabil* 2007;**14**(4):538-46.
6. Taylor RS, Brown A, Ebrahim S, et al. Exercise-based rehabilitation for patients with coronary heart disease: systematic review and meta-analysis of randomized controlled trials. *Am J Med* 2004;**116**(10):682-92.
7. Frederix I, Hansen D, Coninx K, et al. Effect of comprehensive cardiac telerehabilitation on one-year cardiovascular rehospitalization rate, medical costs and quality of life: A cost-effectiveness analysis. *Eur J Prev Cardiol* 2015.
8. Lawler PR, Fillion KB, Eisenberg MJ. Efficacy of exercise-based cardiac rehabilitation post-myocardial infarction: a systematic review and meta-analysis of randomized controlled trials. *Am Heart J* 2011;**162**(4):571-84 e2.
9. Pack QR, Squires RW, Lopez-Jimenez F, et al. Participation Rates, Process Monitoring, and Quality Improvement Among Cardiac Rehabilitation Programs in the United States: A NATIONAL SURVEY. *J Cardiopulm Rehabil Prev* 2015;**35**(3):173-80.
10. Laukkanen JA. Cardiac rehabilitation: why is it an underused therapy? *Eur Heart J* 2015;**36**(24):1500-1.
11. Jelinek MV, Thompson DR, Ski C, et al. 40 years of cardiac rehabilitation and secondary prevention in post-cardiac ischaemic patients. Are we still in the wilderness? *Int J Cardiol* 2015;**179**:153-9.
12. Berry JD. Preventive Cardiology Update: Controversy, Consensus, and Future Promise. *Prog Cardiovasc Dis* 2015.
13. Chew DP, French J, Briffa TG, et al. Acute coronary syndrome care across Australia and New Zealand: the SNAPSHOT ACS study. *Med J Aust* 2013;**199**(3):185-91.
14. Shanmugasagaram S, Perez-Terzic C, Jiang X, et al. Cardiac rehabilitation services in low-and middle-income countries: a scoping review. *J Cardiovasc Nurs* 2014;**29**(5):454-63.
15. Turk-Adawi K, Sarrafzadegan N, Grace SL. Global availability of cardiac rehabilitation. *Nat Rev Cardiol* 2014;**11**(10):586-96.
16. Zhang Z, Pack Q, Squires RW, et al. Availability and characteristics of cardiac rehabilitation programmes in China. *Heart Asia* 2016;**8**(2):9-12.
17. Wang W, Chair SY, Thompson DR, et al. Health care professionals' perceptions of hospital-based cardiac rehabilitation in mainland China: an exploratory study. *J Clin Nurs* 2009;**18**(24):3401-8.
18. Jin H, Wei Q, Chen L, et al. Obstacles and alternative options for cardiac rehabilitation in Nanjing, China: an exploratory study. *BMC Cardiovasc Disord* 2014;**14**:20.
19. Varnfield M, Karunanithi M, Lee CK, et al. Smartphone-based home care model improved use of cardiac rehabilitation in postmyocardial infarction patients: results from a randomised controlled trial. *Heart* 2014;**100**(22):1770-9.
20. Neubeck L, Redfern J, Fernandez R, et al. Telehealth interventions for the secondary prevention of coronary heart disease: a systematic review. *Eur J Cardiovasc Prev Rehabil* 2009;**16**(3):281-9.

21. Rawstorn JC, Gant N, Direito A, et al. Telehealth exercise-based cardiac rehabilitation: a systematic review and meta-analysis. *Heart* 2016.
22. Szalewska D, Zielinski P, Tomaszewski J, et al. Effects of outpatient followed by home-based telemonitored cardiac rehabilitation in patients with coronary artery disease. *Kardiol Pol* 2015;**73**(11):1101-7.
23. Interlligence P. WeChat 2017 user research and business opportunities insight. Secondary WeChat 2017 user research and business opportunities insight, 29 November 2016. <http://tech.qq.com/a/20170424/004233.htm#p=4>.
24. He C, Wu S, Zhao Y, et al. Social Media-Promoted Weight Loss Among an Occupational Population: Cohort Study Using a WeChat Mobile Phone App-Based Campaign. *J Med Internet Res* 2017;**19**(10):e357.
25. Chan AW, Tetzlaff JM, Altman DG, et al. SPIRIT 2013: new guidance for content of clinical trial protocols. *Lancet* 2013;**381**(9861):91-2.
26. Chan AW, Tetzlaff JM, Altman DG, et al. SPIRIT 2013 Statement: defining standard protocol items for clinical trials. *Rev Panam Salud Publica* 2015;**38**(6):506-14.
27. Chan AW, Tetzlaff JM, Gotsche PC, et al. SPIRIT 2013 explanation and elaboration: guidance for protocols of clinical trials. *BMJ* 2013;**346**:e7586.
28. Casillas JM, Hannequin A, Besson D, et al. Walking tests during the exercise training: specific use for the cardiac rehabilitation. *Ann Phys Rehabil Med* 2013;**56**(7-8):561-75.
29. Gremeaux V, Troisgros O, Benaim S, et al. Determining the minimal clinically important difference for the six-minute walk test and the 200-meter fast-walk test during cardiac rehabilitation program in coronary artery disease patients after acute coronary syndrome. *Arch Phys Med Rehabil* 2011;**92**(4):611-9.
30. Beatty AL, Schiller NB, Whooley MA. Six-minute walk test as a prognostic tool in stable coronary heart disease: data from the heart and soul study. *Arch Intern Med* 2012;**172**(14):1096-102.
31. Woodruffe S, Neubeck L, Clark RA, et al. Australian Cardiovascular Health and Rehabilitation Association (ACRA) core components of cardiovascular disease secondary prevention and cardiac rehabilitation 2014. *Heart Lung Circ* 2015;**24**(5):430-41.
32. Kaminsky LA, Brubaker PH, Guazzi M, et al. Assessing Physical Activity as a Core Component in Cardiac Rehabilitation: a position statement of the american association of cardiovascular and pulmonary rehabilitation. *J Cardiopulm Rehabil Prev* 2016;**36**(4):217-29.
33. Organization WH. Physical status: the use and interpretation of anthropometry Geneva, 1995.
34. Gabb GM, Mangoni AA, Anderson CS, et al. Guideline for the diagnosis and management of hypertension in adults - 2016. *Med J Aust* 2016;**205**(2):85-9.
35. Harris PA, Taylor R, Thielke R, et al. Research electronic data capture (REDCap)--a metadata-driven methodology and workflow process for providing translational research informatics support. *J Biomed Inform* 2009;**42**(2):377-81.
36. Wang SS, Lay S, Yu HN, et al. Dietary Guidelines for Chinese Residents (2016): comments and comparisons. *J Zhejiang Univ Sci B* 2016;**17**(9):649-56.
37. Smith SC, Jr., Benjamin EJ, Bonow RO, et al. AHA/ACCF Secondary Prevention and Risk Reduction Therapy for Patients with Coronary and other Atherosclerotic Vascular Disease: 2011 update: a guideline from the American Heart Association and American College of Cardiology Foundation. *Circulation* 2011;**124**(22):2458-73.
38. Piepoli MF, Hoes AW, Agewall S, et al. 2016 European Guidelines on cardiovascular disease prevention in clinical practice: The Sixth Joint Task Force of the European Society of Cardiology and Other Societies on Cardiovascular Disease Prevention in Clinical Practice (constituted by representatives of 10 societies and by invited experts)Developed with the special contribution of the European Association for Cardiovascular Prevention & Rehabilitation (EACPR). *Eur Heart J* 2016;**37**(29):2315-81.

- 1  
2  
3 39. Singh SJ, Puhan MA, Andrianopoulos V, et al. An official systematic review of the European  
4 Respiratory Society/American Thoracic Society: measurement properties of field walking  
5 tests in chronic respiratory disease. *Eur Respir J* 2014;**44**(6):1447-78.
- 6 40. Chan CW, Lopez V, Chung JW. A survey of coronary heart disease knowledge in a sample of Hong  
7 Kong Chinese. *Asia Pac J Public Health* 2011;**23**(3):288-97.
- 8 41. Wagner J, Lacey K, Chyun D, et al. Development of a questionnaire to measure heart disease risk  
9 knowledge in people with diabetes: the Heart Disease Fact Questionnaire. *Patient Educ  
10 Couns* 2005;**58**(1):82-7.
- 11 42. v2.1 WSICaE. The WHO STEPwise approach to chronic disease risk factor surveillance (STEPS).  
12 Geneva: World Health Organisation 2008.
- 13 43. Heatherton TF, Kozlowski LT, Frecker RC, et al. The Fagerstrom Test for Nicotine Dependence: a  
14 revision of the Fagerstrom Tolerance Questionnaire. *Br J Addict* 1991;**86**(9):1119-27.
- 15 44. Organisation WH. Global Physical Activity Questionnaire (GPAQ) Analysis Guide.  
16 [http://www.who.int/chp/steps/resources/GPAQ\\_Analysis\\_Guide.pdf](http://www.who.int/chp/steps/resources/GPAQ_Analysis_Guide.pdf) 2011.
- 17 45. Spitzer RL, Kroenke K, Williams JB, et al. A brief measure for assessing generalized anxiety  
18 disorder: the GAD-7. *Arch Intern Med* 2006;**166**(10):1092-7.
- 19 46. Kroenke K, Spitzer RL, Williams JB. The PHQ-9: validity of a brief depression severity measure. *J  
20 Gen Intern Med* 2001;**16**(9):606-13.
- 21 47. Ware J, Jr., Kosinski M, Keller SD. A 12-Item Short-Form Health Survey: construction of scales and  
22 preliminary tests of reliability and validity. *Med Care* 1996;**34**(3):220-33.
- 23  
24  
25  
26  
27  
28  
29  
30  
31  
32  
33  
34  
35  
36  
37  
38  
39  
40  
41  
42  
43  
44  
45  
46  
47  
48  
49  
50  
51  
52  
53  
54  
55  
56  
57  
58  
59  
60

**Table 1.** Topic list of WeChat-based cartoon-format health education

- 
1. Welcome to SMART-CR/SP from Dr Kang
  2. Mr. Li's heart attack (episode 1)
  3. Mr. Li's heart attack (episode 2)
  4. How you heart works
  5. Coronary heart disease
  6. Angina and management
  7. Heart attack signs
  8. Action plan for heart attack
  9. Risk factors of coronary heart disease
  10. Clinical tests for coronary heart disease
  11. Percutaneous coronary intervention therapy
  12. Medication management after percutaneous intervention therapy
  13. Physical activity after percutaneous intervention therapy (episode 1)
  14. Physical activity after percutaneous intervention therapy (episode 2)
  15. Physical activity after percutaneous intervention therapy (episode 3)
  16. Healthy eating (episode 1)
  17. Healthy eating (episode 2)
  18. Healthy eating (episode 3)
  19. Diet-fat facts
  20. Diet-salt facts
  21. Smoking cessation
  22. Blood pressure management
  23. Management of cholesterol
  24. Management of diabetes
  25. Weight management
  26. Alcohol and heart health
  27. Mental health and heart health
  28. Back to normal life after percutaneous coronary intervention
  29. Myths about coronary heart disease
  30. Cardiac pulmonary resuscitation
-

1  
2  
3  
4  
5  
6  
7  
8  
9  
10  
11  
12  
13  
14  
15  
16  
17  
18  
19  
20  
21  
22  
23  
24  
25  
26  
27  
28  
29  
30  
31  
32  
33  
34  
35  
36  
37  
38  
39  
40  
41  
42  
43  
44  
45  
46  
47  
48  
49  
50  
51  
52  
53  
54  
55  
56  
57  
58  
59  
60

---

|     |                                            |
|-----|--------------------------------------------|
| 31. | Hands-only cardiac pulmonary resuscitation |
| 32. | Goodbye and long-term management           |

---

For peer review only

**Table 2.** Assessment time-points for primary and secondary outcomes of SMART-CR/SP

| Outcome                           | Assessment                                                                                              | Baseline | 8-week | 6-month | 12-month |
|-----------------------------------|---------------------------------------------------------------------------------------------------------|----------|--------|---------|----------|
| <i>Primary outcome</i>            |                                                                                                         |          |        |         |          |
| <b>Exercise capacity</b>          | Change in 6MWT distance                                                                                 | ✓        | ✓      | ✓       |          |
| <i>Key secondary outcome</i>      |                                                                                                         |          |        |         |          |
| <b>Knowledge of the disease</b>   | Modified CHD questionnaire <sup>40 41</sup>                                                             | ✓        | ✓      | ✓       | ✓        |
| <i>Secondary outcomes</i>         |                                                                                                         |          |        |         |          |
| <b>Blood pressure</b>             | Average of two resting, sitting digital recordings                                                      | ✓        | ✓      | ✓       |          |
| <b>Lipid profile</b>              | Fasting blood sample                                                                                    | ✓        | ✓      | ✓       | ✓        |
| <b>Medication adherence</b>       | Adherent to cardiac-protective medications                                                              | ✓        | ✓      | ✓       | ✓        |
| <b>Smoking</b>                    | Self-report                                                                                             | ✓        | ✓      | ✓       | ✓        |
| <b>Obesity</b>                    | Weight, height, waist and hip circumference                                                             | ✓        | ✓      | ✓       |          |
| <b>Physical activity</b>          | General Physical Activity Questionnaire <sup>44</sup>                                                   | ✓        | ✓      | ✓       | ✓        |
| <b>Fruit and vegetable intake</b> | WHO Steps instrument <sup>42</sup>                                                                      | ✓        | ✓      | ✓       | ✓        |
| <b>Anxiety symptoms</b>           | Generalized Anxiety Disorder 7-item (GAD-7) scale <sup>45</sup>                                         | ✓        | ✓      | ✓       | ✓        |
| <b>Depressive symptoms</b>        | Patient Health Questionnaire (PHQ-9) <sup>46</sup>                                                      | ✓        | ✓      | ✓       | ✓        |
| <b>Quality of life</b>            | SF-12_V2™ Health Survey <sup>47</sup>                                                                   | ✓        | ✓      | ✓       | ✓        |
| <b>CV events</b>                  | CVD death, non-fatal AMI, stroke or hospital admission with unstable angina or congestive heart failure |          | ✓      | ✓       | ✓        |
| <b>CR/SP needs survey</b>         | Patient needs for the core components of CR/SP <sup>31</sup>                                            | ✓        | ✓      | ✓       | ✓        |
| <b>All-cause mortality</b>        | Data from CDC                                                                                           |          | ✓      | ✓       | ✓        |



1  
2  
3 6MWT, six minute walk test distance; CHD, coronary heart disease; CR/SP, cardiac  
4 rehabilitation and secondary prevention; AMI, acute myocardial infarction; BP, blood pressure;  
5 CV, cardiovascular; LDL, low-density lipoprotein; WHO, World Health Organization; CDC, Centre  
6 Disease Control and Prevention.  
7  
8  
9  
10  
11  
12  
13  
14  
15  
16  
17  
18  
19  
20  
21  
22  
23  
24  
25  
26  
27  
28  
29  
30  
31  
32  
33  
34  
35  
36  
37  
38  
39  
40  
41  
42  
43  
44  
45  
46  
47  
48  
49  
50  
51  
52  
53  
54  
55  
56  
57  
58  
59  
60

For peer review only

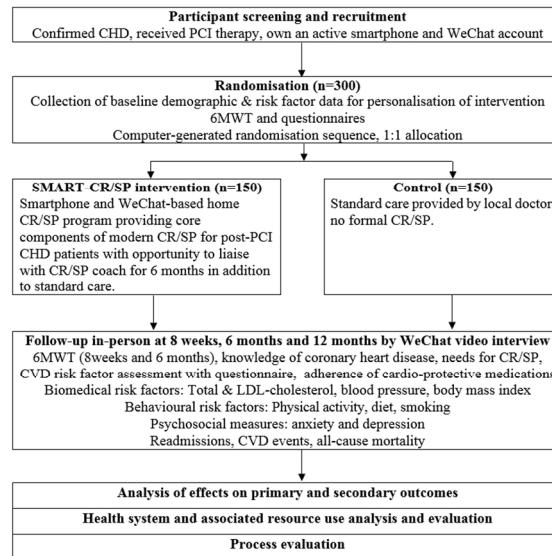

Figure 1. Randomised controlled trial design and flowchart. The control group will receive usual care but no formal CR/SP. The intervention group will receive a smartphone and WeChat-based CR/SP program providing education and support for risk factor monitoring and modification.

338x190mm (300 x 300 DPI)

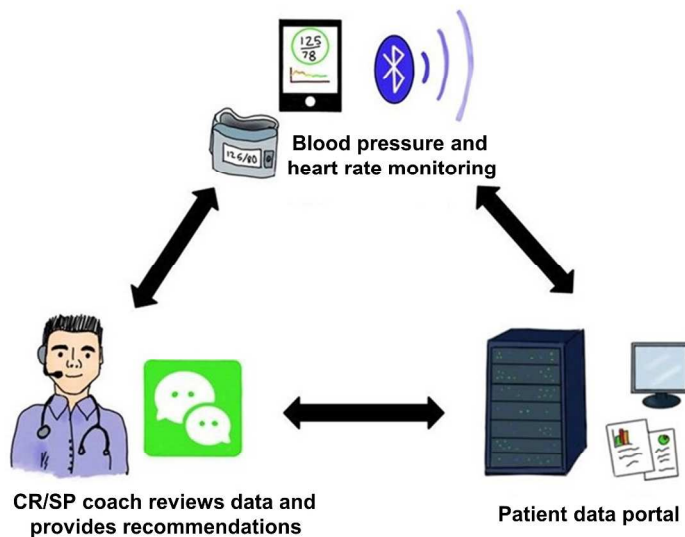

Figure 2. Components of the SMART-CR/SP system: physical activity tracking with interactive feedback and goal setting; education modules addressing disease understanding and self-management; remote blood pressure monitoring and strategies to improve medication adherence. Furthermore, a dedicated data portal and a CR/SP coach will facilitate individualised supervision and counselling.

338x190mm (300 x 300 DPI)

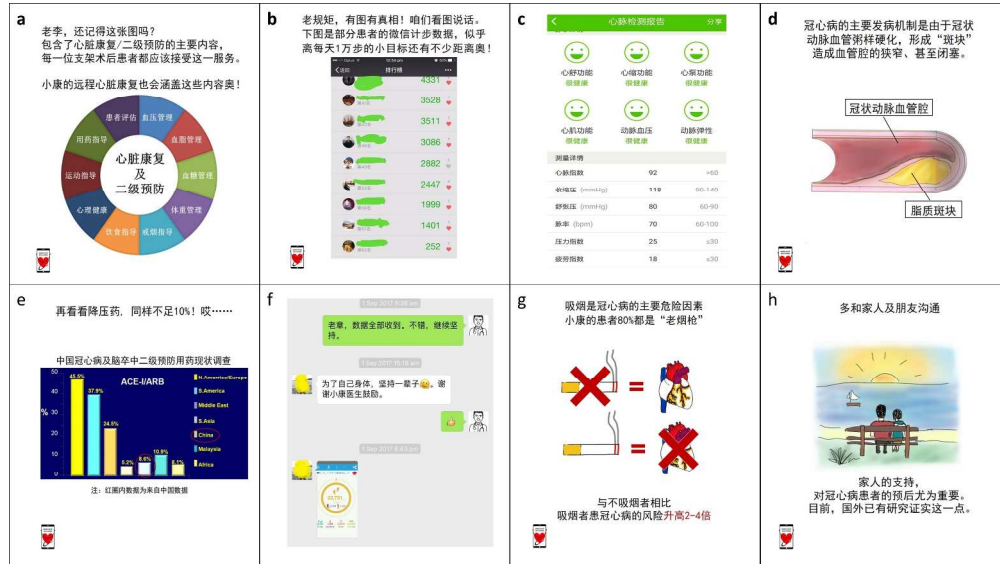

Figure 3. SMART-CR/SP system interface depicting health education(a), physical activity tracking(b), blood pressure monitoring(c), cholesterol management(d), medication management(e), individual counselling(f), smoking secession(g), mental health(h)!! + !! +

338x190mm (300 x 300 DPI)

# BMJ Open

## SMARTphone and social media-based Cardiac Rehabilitation and Secondary Prevention (SMART-CR/SP) for patients with coronary heart disease in China: a randomised controlled trial protocol

|                                 |                                                                                                                                                                                                                                                                                                                                                                                                                                                                                                                                                                                                                                                                                                                                                                                                                                                                                                                                                                                                             |
|---------------------------------|-------------------------------------------------------------------------------------------------------------------------------------------------------------------------------------------------------------------------------------------------------------------------------------------------------------------------------------------------------------------------------------------------------------------------------------------------------------------------------------------------------------------------------------------------------------------------------------------------------------------------------------------------------------------------------------------------------------------------------------------------------------------------------------------------------------------------------------------------------------------------------------------------------------------------------------------------------------------------------------------------------------|
| Journal:                        | <i>BMJ Open</i>                                                                                                                                                                                                                                                                                                                                                                                                                                                                                                                                                                                                                                                                                                                                                                                                                                                                                                                                                                                             |
| Manuscript ID                   | bmjopen-2018-021908.R1                                                                                                                                                                                                                                                                                                                                                                                                                                                                                                                                                                                                                                                                                                                                                                                                                                                                                                                                                                                      |
| Article Type:                   | Protocol                                                                                                                                                                                                                                                                                                                                                                                                                                                                                                                                                                                                                                                                                                                                                                                                                                                                                                                                                                                                    |
| Date Submitted by the Author:   | 05-Apr-2018                                                                                                                                                                                                                                                                                                                                                                                                                                                                                                                                                                                                                                                                                                                                                                                                                                                                                                                                                                                                 |
| Complete List of Authors:       | Dorje, Tashi; Curtin University - Perth City Campus, Physiotherapy and Exercise Science<br>Zhao, Gang; 2. Department of Cardiology, Fudan University Zhongshan Hospital, Shanghai, China<br>Scheer, Anna ; 1. School of Physiotherapy and Exercise Science, Curtin University, Perth, Australia<br>Tsokey, Lhamo ; 2. Department of Cardiology, Fudan University Zhongshan Hospital, Shanghai, China<br>Wang, Jing; 2. Department of Cardiology, Fudan University Zhongshan Hospital, Shanghai, China<br>Chen, Yaolin; 2. Department of Cardiology, Fudan University Zhongshan Hospital, Shanghai, China<br>Tso, Khandro; 4. Internal Medicine Department, Qilian County Hospital, Qinghai, China<br>Tan, B-K; 5. Allied Health Department, Armadale Health Service, Perth, Australia<br>Ge, Junbo; 2. Department of Cardiology, Fudan University Zhongshan Hospital, Shanghai, China Shanghai, CN<br>Maiorana, Andrew; Curtin University - Perth City Campus, School of Physiotherapy and Exercise Science |
| <b>Primary Subject Heading</b>: | Cardiovascular medicine                                                                                                                                                                                                                                                                                                                                                                                                                                                                                                                                                                                                                                                                                                                                                                                                                                                                                                                                                                                     |
| Secondary Subject Heading:      | Rehabilitation medicine                                                                                                                                                                                                                                                                                                                                                                                                                                                                                                                                                                                                                                                                                                                                                                                                                                                                                                                                                                                     |
| Keywords:                       | Coronary heart disease < CARDIOLOGY, cardiac rehabilitation, secondary prevention, social media, WeChat                                                                                                                                                                                                                                                                                                                                                                                                                                                                                                                                                                                                                                                                                                                                                                                                                                                                                                     |
|                                 |                                                                                                                                                                                                                                                                                                                                                                                                                                                                                                                                                                                                                                                                                                                                                                                                                                                                                                                                                                                                             |

SCHOLARONE™  
Manuscripts

1  
2  
3 **Title:** SMARTphone and social media-based Cardiac Rehabilitation and Secondary  
4 Prevention (SMART-CR/SP) for patients with coronary heart disease in China: a randomised  
5 controlled trial protocol  
6

7 **Authors:** Tashi Dorje<sup>1</sup>, Gang Zhao<sup>2</sup>, Anna Scheer<sup>1</sup>, Lhamo Tsokey<sup>2</sup>, Jing Wang<sup>2</sup>, Yaolin  
8 Chen<sup>2</sup>, Khandro Tso<sup>4</sup>, B-K Tan<sup>1,5</sup>, Junbo Ge<sup>2</sup>, Andrew Maiorana<sup>1,3</sup>  
9

10 **Affiliations:**

- 11 1. School of Physiotherapy and Exercise Science, Curtin University, Perth, Australia
- 12 2. Department of Cardiology, Fudan University Zhongshan Hospital, Shanghai, China
- 13 3. Allied Health Department and Advanced Heart Failure and Cardiac Transplant Service  
14 Fiona Stanley Hospital, Perth, Australia
- 15 4. Internal Medicine Department, Qilian County Hospital, Qinghai, China
- 16 5. Allied Health Department, Armadale Health Service, Perth, Australia  
17  
18

19 **Corresponding author**

20 Associate Professor Andrew Maiorana  
21 School of Physiotherapy and Exercise Science, Curtin University, Perth, Australia  
22 Email: [A.Maiorana@curtin.edu.au](mailto:A.Maiorana@curtin.edu.au)  
23 Phone number: +61 8 9266 9225  
24 Fax number: +61 8 9266 2605  
25  
26  
27

28 **Word Count:** 5882 (including title page, abstract, references, figures and tables)

29 **Number of tables and figures:** 5  
30  
31  
32  
33  
34  
35  
36  
37  
38  
39  
40  
41  
42  
43  
44  
45  
46  
47  
48  
49  
50  
51  
52  
53  
54  
55  
56  
57  
58  
59  
60

## ABSTRACT

**Introduction:** The burden of cardiovascular disease (CVD) is rapidly increasing in developing countries, however access to cardiac rehabilitation and secondary prevention (CR/SP) in these countries is limited. Alternative delivery models that are low-cost and easy to access are urgently needed to address this service gap. The objective of this study is to investigate whether a smartphone and social media-based (WeChat) home CR/SP program can facilitate risk factor monitoring and modification to improve disease self-management and health outcomes in patients with coronary heart disease (CHD) after percutaneous coronary intervention (PCI) therapy.

**Methods and analysis:** We propose a single-blind, randomised controlled trial of 300 post-PCI patients with follow-up over 12 months. The intervention group will receive a smartphone-based and WeChat-based CR/SP program providing education and support for risk factor monitoring and modification. SMART-CR/SP incorporates core components of modern CR/SP: physical activity tracking with interactive feedback and goal setting; education modules addressing CHD understanding and self-management; remote blood pressure monitoring and strategies to improve medication adherence. Furthermore, a dedicated data portal and a CR/SP coach will facilitate individualised supervision and counselling. The control group will receive usual care but no formal CR/SP program. The primary outcome is change in exercise capacity measured by six-minute walk test distance. Secondary outcomes include knowledge and awareness of CHD, risk factor status, medication adherence, psychological well-being and quality of life, major cardiovascular events, re-hospitalisations and all-cause mortality. To assess the feasibility and patients' acceptance of the intervention, a process evaluation will be performed at the conclusion of the study.

1  
2  
3  
4  
5 **Ethics and dissemination:** Ethics approval was granted by both the Human Research Ethics  
6  
7 Committee of Fudan University Zhongshan Hospital [HREC B2016-058] and Curtin  
8  
9 University Human Research Ethics Office [HRE2016-0120]. Results will be disseminated via  
10  
11 peer-reviewed publications and presentations at conferences.  
12  
13

14  
15  
16 **Clinical Trials registration number** ChiCTR-INR-16009598  
17

18 **Key words:** coronary heart disease, cardiac rehabilitation, secondary prevention, social  
19 media  
20

21  
22 **Word count:** 308  
23  
24  
25  
26  
27  
28  
29  
30  
31  
32  
33  
34  
35  
36  
37  
38  
39  
40  
41  
42  
43  
44  
45  
46  
47  
48  
49  
50  
51  
52  
53  
54  
55  
56  
57  
58  
59  
60



## STRENGTHS AND LIMITATIONS OF THE STUDY

- We propose an innovative social media-based cardiac rehabilitation/secondary prevention (CR/SP) program to deliver community-based support for patients with coronary heart disease, after hospitalisation for percutaneous coronary intervention therapy. To our knowledge, this will be the first study to evaluate a CR/SP program provided exclusively via social media.
- To inform the design of the intervention, end-user surveys and focus group discussions were undertaken to identify patients' needs related to CR/SP.
- This will be a single-centre study, which may limit the generalisation and application of the study results to a broader population. However, the large geographic, cultural and socioeconomic diversity of patients admitted at the study hospital may help to reduce this potential bias.
- The study is limited to patients with smartphones and internet access.
- It is possible that the increased exposure to the health system experienced by participants in the experimental group will influence their behaviour, independent of the effects of the mHealth intervention.

## INTRODUCTION

The rapid economic growth and industrialisation of China over the past three decades has been paralleled by a growing epidemic of coronary heart disease (CHD). It is estimated there are over 11 million Chinese people with this disease, a figure expected to increase steadily in the next few decades.<sup>1-3</sup> In 2015, over 560,000 cases of percutaneous coronary intervention (PCI), a common treatment for CHD, were performed in mainland China.<sup>1</sup> People with established CHD are at high risk of recurrent cardiac events<sup>4</sup> which place a significant burden on healthcare services. However, these events can be reduced by up to half with effective secondary prevention, such as adherence to cardio-protective medication and lifestyle modification.<sup>5</sup>

Cardiac rehabilitation and secondary prevention (CR/SP) are systematic, evidence-based processes that facilitate the delivery of preventive therapies and improve patient outcomes after a cardiovascular event. Participation in CR/SP programs can reduce mortality by up to 25%, improve quality of life and reduce cardiovascular risk factor burden.<sup>6 7</sup> However, despite the well-established benefits, CR/SP services are still grossly underutilised globally. Data from developed countries, such as the United States and Australia, reported patient participation rates of between 30% and 45%, with high dropout rates of between 40% and 55%.<sup>8-12</sup> In low and middle income countries (LMICs), access to CR/SP services remains very low, with less than a quarter of countries having CR/SP programs.<sup>13 14</sup> In China, despite recent advances in the medical management of CHD, very few patients currently receive CR/SP services.<sup>15 16</sup> This may be due in part to the challenges associated with establishing traditional models of CR/SP in the Chinese healthcare environment, such as the lack of specific funding, staff education and training, reimbursements for participating patients.<sup>15-17</sup>

1  
2  
3 Accordingly, there is a need for innovative strategies to implement this evidence-based  
4  
5 therapy in China.  
6  
7

8  
9 Internet and smartphone-based interventions have recently been shown to be effective  
10  
11 alternative methods for delivering rehabilitation and secondary prevention programs for  
12  
13 people with CHD.<sup>18-21</sup> Especially in the context of risk factor modification and behaviour  
14  
15 change<sup>22-24</sup>. The rapid increase in smartphone and social media users in China has created a  
16  
17 strong platform for the delivery of CR/SP services via these media. For example, it is  
18  
19 reported that there are over 800 million active users of WeChat, a popular social media site in  
20  
21 China.<sup>25</sup> However, there are currently no studies that have examined the feasibility and  
22  
23 efficacy of utilising smartphones and social media to provide rehabilitation and secondary  
24  
25 prevention services for the Chinese population. A recent study that used WeChat to support  
26  
27 weight loss has shown positive results. In this study, participants who were more active in the  
28  
29 WeChat-based weight loss program lost more weight, highlighting that social media may  
30  
31 offer a promising new approach to managing chronic health conditions.<sup>26</sup>  
32  
33  
34  
35  
36

37 It is in this context that we have developed the smartphone and WeChat-based home cardiac  
38  
39 rehabilitation and secondary prevention (SMART-CR/SP) study.  
40  
41  
42  
43

## 44 **METHODS AND ANALYSIS**

### 45 **Study Design**

46  
47 SMART-CR/SP will be a single-blind, two-arm, parallel, randomised controlled trial to  
48  
49 evaluate the effects of CR/SP delivered via smartphone and WeChat on patient exercise  
50  
51 capacity, knowledge and awareness of the disease, medication adherence, blood pressure,  
52  
53 lipid profile, quality of life and clinical outcomes (Figure 1). The protocol conforms to the  
54  
55  
56  
57

1  
2  
3 SPIRIT 2013 statement and the intervention is described in accordance with the CONSORT-  
4 EHEALTH checklist.<sup>27-29</sup>  
5  
6  
7  
8

### 9 **Eligibility and recruitment**

10 Patients between the ages of 18-70 years with a diagnosis of CHD, including myocardial  
11 infarction, unstable or stable angina, who are treated with PCI therapy during their current  
12 admission will be eligible for inclusion. All participants will be required to personally own an  
13 operational smartphone, have an active WeChat account and sufficient Chinese language  
14 proficiency.  
15  
16  
17  
18  
19  
20  
21  
22  
23

24 Exclusion criteria include: contra-indications to exercise rehabilitation (e.g. untreated  
25 ventricular tachycardia, severe heart failure, uncontrolled hypertension or hypotension,  
26 significant exercise limitations), an inability to operate a smartphone for the purpose of the  
27 trial (e.g. vision, hearing, cognitive or dexterity impairment), lack of internet access at place  
28 of residence, or having pre-existing comorbid disease with a life expectancy of less than one  
29 year.  
30  
31  
32  
33  
34  
35  
36  
37

38 Recruitment will occur during hospital admission at Fudan University Zhongshan Hospital in  
39 Shanghai. The hospital is a preeminent public hospital in Eastern China, servicing a culturally  
40 and socioeconomically diverse population from across the nation. Patients admitted with  
41 CHD, and who receive PCI therapy during their admission, will be screened and those  
42 meeting the inclusion criteria will be invited to participate in the study. A face-to-face  
43 interview will be arranged for patients who express an interest in the trial, and formal written  
44 consent will be obtained from candidates who agree to participate.  
45  
46  
47  
48  
49  
50  
51  
52  
53

### 54 **Sample size calculation**

1  
2  
3 A 25 metre improvement in the six-minute walk test (6MWT) is considered to be clinically  
4 meaningful.<sup>30-32</sup> Thus, to detect a minimal clinically important difference of 25 meters for the  
5 6MWT with 90% power (type I error = 5%, two-sided test), assuming a SD of 60 meters<sup>18</sup>,  
6  
7 we will require a total sample size of 242 across both arms of the study. Assuming, an  
8  
9  
10  
11  
12  
13  
14  
15  
16  
17  
18  
19  
20  
21  
22  
23  
24  
25  
26  
27  
28  
29  
30  
31  
32  
33  
34  
35  
36  
37  
38  
39  
40  
41  
42  
43  
44  
45  
46  
47  
48  
49  
50  
51  
52  
53  
54  
55  
56  
57  
58  
59  
60

### **Randomisation and blinding**

Following provision of consent, participants will be randomised in a 1:1 fashion to a smartphone and WeChat-based cardiac rehabilitation and secondary prevention program (SMART-CR/SP) group, or a usual care group by using the random allocation sequences generated from SAS software (SAS Institute Inc., Cary, NC, USA). The SMART-CR/SP program will be initiated within two weeks of participant discharge following PCI therapy. Participants will be informed of their group allocation through a single WeChat message. Additionally, participants in the intervention group will receive their first cartoon-format WeChat article, illustrating the SMART-CR/SP program, to familiarise them with the system and mobile technologies involved. Additional technology training will be provided if required by the participant. Research personnel involved in participants' assessments will be blinded to treatment allocation.

### **Control (usual care) group**

Participants in the usual care group will receive standard care as provided by their community doctors and cardiologists after hospital discharge. In China, current post-PCI care involves brief inpatient health education provided by a ward nurse, medication management and ad hoc follow-up visits to a cardiologist or other health care providers according to the patient's self-assessment of their own cardiovascular health.

### **Intervention group**

In addition to usual care, participants in the SMART-CR/SP group will receive an eight week comprehensive smartphone and WeChat-based home CR/SP program providing core components of guideline advocated CR/SP for post-PCI CHD patients,<sup>33,34</sup> followed by a 16-week 'step-down' program. Figure 2 provides a pictorial representation of the interactive system.

### **Cardiac health education**

A culturally appropriate and user-friendly WeChat-based cardiac health education system has been developed for this trial, which consists of 32 episodes of cartoon-format CHD educational articles, covering a broad range of cardiovascular health education topics relevant to post-PCI CHD patients (Figure 3). In the first eight weeks, participants will receive four WeChat educational articles per week. Each of the articles will introduce one key educational topic using a short interactive story involving dialogue between a patient and cardiologist avatar that is illustrated by 20-30 cartoon drawing slides. In the 'step-down' program, two cartoon drawing slides with a key motivational message attached to each will be sent to participants' WeChat account every week. The WeChat articles/slides and messages will be sent during random working hours on random weekdays from an official WeChat account (avatar name: Dr. Kang: an abbreviation of "rehabilitation" in Chinese). Table 1 shows the content of the cardiac health education.

### **Role of the CR/SP coach**

A cardiologist will act as the CR/SP coach, whose main task is to review participants' data on a regular basis and provide guidance and medical advice as required. All questions and enquiries from participants will be reviewed and replied to by the CR/SP coach using the

1  
2  
3 study's official WeChat account (Dr Kang). Replies will be made within one business day,  
4  
5 and video calls will be booked if required by the participants.  
6  
7  
8  
9

### 10 **Exercise prescription and physical activity tracking**

11  
12  
13 Participants will receive an individualised walking program based on their baseline 6MWT,  
14  
15 with both the time and intensity of walking increased gradually over the first eight weeks.  
16  
17 The target physical activity level will be 10,000 accumulated steps of walking per day, at  
18  
19 least five times per week, in accordance with international recommendations.<sup>35</sup> Utilising  
20  
21 WeChat's physical activity tracker, WeChat Sports, participants will be able to review their  
22  
23 real-time, weekly and monthly step counts. The CR/SP coach, as a WeChat 'friend' of the  
24  
25 participant, will have access to their step counts and will review participants' physical  
26  
27 activity data on a weekly basis, provide guidance and positive reinforcement on days that  
28  
29 target physical activity levels are achieved. Participants will also be encouraged to undertake  
30  
31 other forms of physical activity, such as swimming, Tai Chi, group dancing and table tennis.  
32  
33  
34  
35

### 36 **Blood pressure monitoring and management**

37  
38  
39 Participants will be provided with a Bluetooth enabled blood pressure monitoring device (C-  
40  
41 health XY-10, Sky Innovation Technology Ltd. (Shanghai)), and will be asked to measure  
42  
43 their blood pressure on two days per week, with two measurements each day, one minute  
44  
45 apart. The blood pressure readings will be transmitted via Bluetooth technology to a  
46  
47 dedicated application on participants' smartphones where it will be uploaded to a data  
48  
49 management portal which will be reviewed by the CR/SP and appropriate guidance will be  
50  
51 provided to participants according to contemporary guidelines.<sup>36</sup> A standard procedure and  
52  
53 alerts will be employed when participant's measurement readings are outside the target levels.  
54  
55  
56  
57  
58  
59  
60

1  
2  
3 This will include WeChat alert messages send by the CR/SP coach to remind participants for  
4 repeat blood pressure measurements, medication adherence and to seek medical advice from  
5 their health care givers if indicated. WeChat-based counselling will be provided if participant  
6 prefers to receive advice from the CR/SP coach. This alert system will be ceased once the  
7 target blood pressure is achieved. To facilitate the ability of both the participants and the  
8 CR/SP coach to review the blood pressure data, blood pressure management applications will  
9 be installed on both participants' and physician's smartphone.  
10  
11  
12  
13  
14  
15  
16  
17

### 18 **Cardiovascular risk factor monitoring and management**

19  
20  
21 Cardiovascular risk factors for each participant will be assessed during the baseline face-to-  
22 face assessment. This will involve a detailed review of the participant's PCI therapy, blood  
23 pressure, family history of CVD, glucose levels, lipid profile, smoking status, body mass  
24 index (BMI), hip and waist circumferences, dietary habit, existing sleep apnoea, and diabetes.  
25 Data will be collected and managed using the REDCap electronic data capture tool hosted at  
26 Fudan University.<sup>37</sup> After the initial assessment, participants will be informed of their target  
27 level for each risk factor by the CR/SP coach, and encouraged to try and achieve this goal.  
28 Participants can update their CVD risk factor profile at any time through communication with  
29 the CR/SP coach on WeChat.  
30  
31  
32  
33  
34  
35  
36  
37  
38  
39  
40  
41

### 42 **Healthy nutrition**

43  
44  
45 To help participants understand and comply with dietary recommendations, cartoon-format  
46 educational articles developed according to contemporary guidelines<sup>38-40</sup> will be sent to their  
47 WeChat account. Cultural considerations have been taken into account when developing the  
48 dietary content of the educational articles. In addition, participants will be able to photograph  
49 the food they consume and send the pictures to the CR-SP coach through WeChat to get  
50 feedback on the nutritional content of the food.  
51  
52  
53  
54  
55  
56  
57  
58  
59  
60



### **Cardiac medication management**

The medication list of each participant will be reviewed by the CR/SP coach at baseline to ensure that the five classes of recommended cardio-protective medications have been prescribed (aspirin, adenosine diphosphate (ADP) receptor antagonist, beta-blocker, angiotensin-converting-enzyme (ACE) inhibitor or angiotensin II receptor blockers (ARBs), and a statin/ lipid-lowering medication). If any of the cardio-protective medications are not prescribed for the participant then underlying reasons (contraindicated/previously documented intolerance) will be investigated. The participant will be notified and encouraged by the CR/SP coach to discuss their medication therapy with their doctors if they are not prescribed with these medications without justification. Additionally, information relating to the mechanism of these drugs, evidence of clinical benefits, and common side effects will be described in detail in the WeChat cartoon-format educational articles to increase understanding and compliance rates.

### **Outcome assessment**

The outcome measures for the trial are outlined in Table 2. Baseline assessments will occur within two weeks of participants' discharge from hospital, with follow up at eight weeks, six months and 12 months to evaluate both the short-term and longer-term efficacy of the CR/SP intervention. The primary outcome will be the change in exercise capacity from baseline, as assessed by 6MWT distance at eight weeks and six months, using a standardised protocol.<sup>41</sup>

In the 6MWT, oxygen saturation, blood pressure, and heart rate of participants will be measured pre- and post-test.

Secondary outcomes will be participant knowledge of CHD, evaluated by a CHD knowledge questionnaire based on two validated heart disease questionnaires,<sup>42 43</sup> resting blood pressure, fasting plasma glucose and cholesterol levels, adherence to cardio-protective medications,

1  
2  
3 behavioural CHD risk factors including unhealthy diet (WHO Steps instrument);<sup>44</sup> smoking  
4 (Fagerström Test for Nicotine Dependence),<sup>45</sup> low physical activity (IPAQ),<sup>46</sup> overweight or  
5 obesity, as well as psychosocial factors including anxiety symptoms (Generalized Anxiety  
6 Disorder 7-item scale),<sup>47</sup> depressive symptoms (Patient Health Questionnaire),<sup>48</sup> quality of  
7 life (SF-12 V2™ Health Survey),<sup>49</sup> major cardiovascular events (MACE), and all-cause  
8 mortality.

9  
10  
11 Health system and associated resource use relating to CHD will be collected during each  
12 follow up visit from participants' self-report and cross-checked against hospital records. This  
13 will include: emergency department presentations, hospital admissions, outpatient clinic  
14 attendances, and community doctor and specialist consultations. The cost of resource use  
15 relating to CHD will be valued based on the current manual of resource items and their  
16 associated costs published by the Shanghai Municipal Health and Family Planning  
17 Commission.

### 31 **Evaluation of participants' perceptions of SMART CR/SP**

32  
33  
34 Process evaluation will be undertaken by user surveys and focus group discussions. At the  
35 completion of the trial, participants from the intervention group will be invited to complete a  
36 WeChat-based questionnaire to evaluate their experience and perceptions of the program. A  
37 sub-group of participants from the intervention group will be randomly selected and invited  
38 to participate in focus group discussions, to gain a more in-depth understanding of the end-  
39 users' acceptability of the program, their experiences, and expectations of future smartphone  
40 and social media-based CR/SP models. We anticipate approximately five focus groups will  
41 be required, however, sampling will be ceased once thematic saturation is reached. Focus  
42 groups will be conducted by an experienced researcher (Dr Gang Zhao), digitally recorded  
43 and transcribed. Data will be sorted, coded and assigned to categories based on the objectives  
44 via an inductive approach.

## Statistical considerations and data management

The intention to treat principle will be adopted and participants' outcomes will be analysed according to the group to which they are allocated. Baseline characteristics of the cohort will be summarised using descriptive statistics. Continuous variables will be reported as mean and standard deviation and be compared using linear regression models. Potential confounders and baseline values of the dependent variables will be entered as covariates. Categorical variables will be described as frequencies and percentages and compared using Chi-square test. Mann-whitney U test will be used if data are not normally distributed. A Cox proportional hazard model will be performed to analyse hospital readmission, outpatient clinic and emergency department visits. The criterion for statistical significance will be set at  $P < 0.05$ . The statistical analysis will be conducted using SPSSv24 (IBM, USA).

Data will be de-identified once collected, and a study ID will be developed for each participant. Only authorized researchers will have access to the data. Furthermore, a variety of security controls will be implemented. Given the short period of the intervention and low risk of the trial, a data monitoring committee will not be formed. However, regular data review will be performed to minimize adverse events and other unintended effects.

## Patient and public involvement

Patient and public involvement (PPI) played a key role in this study. During the study design, intervention platform development and piloting, post PCI patients and their relatives were invited to take part in surveys and focus group discussions. This allowed us to develop a comprehensive understanding of their perceptions and needs of CR/SP services, facilitators and barriers for participating in CR/SP, as well as the acceptability of mHealth-based CR/SP services. Furthermore, surveys among medical staff were conducted to understand their

1  
2  
3 priorities, experience and preferences relating to CR/SP service development and provision.  
4  
5 PPI also provided valuable information to help the research team to select the appropriate  
6  
7 intervention delivery method, questionnaires and outcome measures, along with the burden of  
8  
9 the intervention. The results of the study will be disseminated to PPI representatives and  
10  
11 study participants who wished to be notified.  
12

## 13 14 **ETHICS AND DISSEMINATION**

15  
16  
17 The Human Research Ethics Committee of Fudan University Zhongshan Hospital granted the  
18  
19 primary ethics approval for the trial [HREC B2016-058]. The Curtin University Human  
20  
21 Research Ethics Office granted the reciprocal approval for the trial [HRE2016-0120]. The  
22  
23 report of the study will be disseminated via the usual scientific forums including peer-  
24  
25 reviewed publications and presentations at national and international conferences.  
26  
27

## 28 29 30 **DISCUSSION**

31  
32 The SMART-CR/SP study will evaluate the feasibility and impact of an innovative  
33  
34 smartphone and WeChat-based home CR/SP program for patients with CHD after PCI  
35  
36 therapy. We are not aware of any previously published studies that have reported the efficacy  
37  
38 of a smartphone and social media CR/SP service delivery model.  
39  
40

41  
42  
43 Cardiac rehabilitation and secondary prevention is a Class I recommendation for the  
44  
45 management of CHD patients.<sup>33</sup> However, despite the growing evidence of its cost-  
46  
47 effectiveness<sup>10</sup> and efficacy in reducing cardiovascular morbidity and mortality<sup>7</sup>, CR/SP  
48  
49 services are limited in China. A recent national survey showed that only 30 of 124 (24%)  
50  
51 large medical centres surveyed in China have operational CR programs, translating to  
52  
53 approximately two programs per 100 million inhabitants.<sup>15</sup> To address this service provision  
54  
55  
56  
57  
58  
59  
60

1  
2  
3 gap, there is a clear need to develop alternative delivery models to increase access to CR/SP  
4 services. Social media offers great potential for delivering health education and support  
5 through smartphones. Compared with past telephone and text message support, smartphones  
6 and social media may provide a more powerful, multi-functional platform for disease  
7 management. This includes access to step counting, multi-media messaging, voice/video call  
8 and group discussion. In China, and other LMICs, where access to tertiary and secondary  
9 prevention health care are often limited, these advanced technology functions may greatly  
10 facilitate the delivery of core components of modern CR/SP to many CHD patients who  
11 would not otherwise have had access to these important services. The potential reach of a  
12 smartphone and social media-based CR/SP intervention is great as it could easily be  
13 expanded to reach many smartphone and social media users at a low cost. Furthermore, this  
14 innovative service model could overcome common barriers to patients participating CR/SP  
15 program, such as inconvenience, geographical isolation and financial burden,<sup>20 21 26</sup> given it  
16 is easy to access, flexibility and low cost.  
17  
18  
19  
20  
21  
22  
23  
24  
25  
26  
27  
28  
29  
30  
31  
32  
33  
34

35 In conclusion, SMART-CR/SP will test the utility of a smartphone and WeChat-based  
36 intervention to deliver the core components of guideline advocated CR/SP. If the efficacy of  
37 this social media-based CR/SP intervention is validated, this will have significant potential to  
38 improve access to evidence-based CR/SP for patients with CHD. This is likely to translate to  
39 improved patient outcomes and reduced financial burden of CVD on health systems.  
40 Although the focus of this study is the delivery of a CR/SP intervention via smartphone and  
41 WeChat, there is great potential that this model of care could be adopted in both the primary  
42 and secondary prevention context for other chronic diseases, and using other social media  
43 platforms.  
44  
45  
46  
47  
48  
49  
50  
51  
52  
53  
54  
55  
56  
57  
58  
59  
60

## COMPETING INTERESTS

We declare that there are no conflicts of interest related to this clinical trial.

## CONSENT FOR PUBLICATION

The manuscript does not contain any individual patient's data in any form.

## FUNDING

This work is funded by TD's PhD scholarship from Curtin University.

All blood pressure monitors were donated by Sky Innovation Technology (Shanghai) Limited, however, no staff from the company will be involved in the design, implementation and data analysis of the study. Significant 'in-kind' support (staff time) was provided by Fudan University Zhongshan Hospital.

## AUTHOR'S CONTRIBUTIONS

TD and AM conceived the original concept of the study and wrote the first draft of the protocol manuscript. ZG, AS, LT, JW, YLC, KT, BKT, JBG contributed to the design of the study. All authors read and approved the final manuscript.

## ACKNOWLEDGEMENTS

We would like to thank the valuable contribution made by the patients and public representatives during the study design and intervention development.

## PROTOCOL VERSION

Issue date: 25 Mar. 2018

Protocol amendment number: 02

**Table 1** Topic list of WeChat-based cartoon-format health education

---

|     |                                                                       |
|-----|-----------------------------------------------------------------------|
| 1.  | Welcome to SMART-CR/SP from Dr Kang                                   |
| 2.  | Mr. Li's heart attack (episode 1)                                     |
| 3.  | Mr. Li's heart attack (episode 2)                                     |
| 4.  | How your heart works                                                  |
| 5.  | Coronary heart disease                                                |
| 6.  | Angina and management                                                 |
| 7.  | Heart attack signs                                                    |
| 8.  | Action plan for heart attack                                          |
| 9.  | Risk factors of coronary heart disease                                |
| 10. | Clinical tests for coronary heart disease                             |
| 11. | Percutaneous coronary intervention therapy                            |
| 12. | Medication management after percutaneous intervention therapy         |
| 13. | Physical activity after percutaneous intervention therapy (episode 1) |
| 14. | Physical activity after percutaneous intervention therapy (episode 2) |
| 15. | Physical activity after percutaneous intervention therapy (episode 3) |
| 16. | Healthy eating (episode 1)                                            |
| 17. | Healthy eating (episode 2)                                            |
| 18. | Healthy eating (episode 3)                                            |
| 19. | Diet-fat facts                                                        |
| 20. | Diet-salt facts                                                       |
| 21. | Smoking cessation                                                     |
| 22. | Blood pressure management                                             |
| 23. | Management of cholesterol                                             |
| 24. | Management of diabetes                                                |
| 25. | Weight management                                                     |
| 26. | Alcohol and heart health                                              |
| 27. | Mental health and heart health                                        |
| 28. | Back to normal life after percutaneous coronary intervention          |
| 29. | Myths about coronary heart disease                                    |
| 30. | Cardiac pulmonary resuscitation                                       |
| 31. | Hands-only cardiac pulmonary resuscitation                            |
| 32. | Goodbye and long-term management                                      |

---

**Table 2** Assessment time-points for primary and secondary outcomes of SMART-CR/SP

| Outcome                           | Assessment                                                                                              | Baseline | 8-week | 6-month | 12-month |
|-----------------------------------|---------------------------------------------------------------------------------------------------------|----------|--------|---------|----------|
| <i>Primary outcome</i>            |                                                                                                         |          |        |         |          |
| <b>Exercise capacity</b>          | Change in 6MWT distance                                                                                 | ✓        | ✓      | ✓       |          |
| <i>Key secondary outcome</i>      |                                                                                                         |          |        |         |          |
| <b>Knowledge of the disease</b>   | Modified CHD questionnaire <sup>42,43</sup>                                                             | ✓        | ✓      | ✓       | ✓        |
| <i>Secondary outcomes</i>         |                                                                                                         |          |        |         |          |
| <b>Blood pressure</b>             | Average of two resting, sitting digital recordings                                                      | ✓        | ✓      | ✓       |          |
| <b>Lipid profile</b>              | Fasting blood sample                                                                                    | ✓        | ✓      | ✓       | ✓        |
| <b>Medication adherence</b>       | Adherent to cardiac-protective medications                                                              | ✓        | ✓      | ✓       | ✓        |
| <b>Smoking</b>                    | Self-report                                                                                             | ✓        | ✓      | ✓       | ✓        |
| <b>Obesity</b>                    | Weight, height, waist and hip circumference                                                             | ✓        | ✓      | ✓       |          |
| <b>Physical activity</b>          | General Physical Activity Questionnaire <sup>46</sup>                                                   | ✓        | ✓      | ✓       | ✓        |
| <b>Fruit and vegetable intake</b> | WHO Steps instrument <sup>44</sup>                                                                      | ✓        | ✓      | ✓       | ✓        |
| <b>Anxiety symptoms</b>           | Generalized Anxiety Disorder 7-item (GAD-7) scale <sup>47</sup>                                         | ✓        | ✓      | ✓       | ✓        |
| <b>Depressive symptoms</b>        | Patient Health Questionnaire (PHQ-9) <sup>48</sup>                                                      | ✓        | ✓      | ✓       | ✓        |
| <b>Quality of life</b>            | SF-12_V2™ Health Survey <sup>49</sup>                                                                   | ✓        | ✓      | ✓       | ✓        |
| <b>CV events</b>                  | CVD death, non-fatal AMI, stroke or hospital admission with unstable angina or congestive heart failure |          | ✓      | ✓       | ✓        |
| <b>CR/SP needs survey</b>         | Patient needs for the core components of CR/SP <sup>33</sup>                                            | ✓        | ✓      | ✓       | ✓        |
| <b>All-cause mortality</b>        | Data from CDC                                                                                           |          | ✓      | ✓       | ✓        |



1  
2  
3 6MWT, six minute walk test distance; CHD, coronary heart disease; CR/SP, cardiac  
4 rehabilitation and secondary prevention; AMI, acute myocardial infarction; BP, blood pressure;  
5 CV, cardiovascular; LDL, low-density lipoprotein; WHO, World Health Organization; CDC, Centre  
6 Disease Control and Prevention.  
7  
8  
9  
10  
11  
12  
13  
14  
15  
16  
17  
18  
19  
20  
21  
22  
23  
24  
25  
26  
27  
28  
29  
30  
31  
32  
33  
34  
35  
36  
37  
38  
39  
40  
41  
42  
43  
44  
45  
46  
47  
48  
49  
50  
51  
52  
53  
54  
55  
56  
57  
58  
59  
60

For peer review only

1  
2  
3 **Figure 1** : Randomised controlled trial design and flowchart. The control group will receive  
4  
5 usual care but no formal CR/SP. The intervention group will receive a smartphone and  
6  
7 WeChat-based CR/SP program providing education and support for risk factor monitoring  
8  
9 and modification.  
10

11  
12 CHD, coronary heart disease; PCI, percutaneous coronary intervention; CR/SP, cardiac  
13  
14 rehabilitation/secondary prevention; CVD, cardiovascular disease; 6MWT, six-minute walk  
15  
16 test; CR/SP, cardiac rehabilitation and secondary prevention; LDL, low-density lipoprotein  
17  
18

19  
20 **Figure 2** Components of the Smart-CR/SP system

21  
22 SMART-CR/SP incorporates core components of modern CR/SP: physical activity tracking  
23  
24 with interactive feedback and goal setting; education modules addressing CHD understanding  
25  
26 and self-management; remote blood pressure monitoring and strategies to improve  
27  
28 medication adherence. Furthermore, a dedicated data portal and a CR/SP coach will facilitate  
29  
30 individualised supervision and counselling.  
31  
32

33  
34 **Figure 3** WeChat-based CR/SP system interface depicting health education(a), physical  
35  
36 activity tracking(b), blood pressure monitoring(c), cholesterol management(d), medication  
37  
38 management(e), individual counselling(f), smoking secession(g), mental health(h)  
39  
40  
41  
42  
43  
44  
45  
46  
47  
48  
49  
50  
51  
52  
53  
54  
55

## REFERENCES

1. Weiwei C, Runlin G, Lisheng L, et al. Outline of the report on cardiovascular diseases in China, 2016. *China Journal of Circulation* 2017;**32**(6):521-30.
2. Bi Y, Jiang Y, He J, et al. Status of cardiovascular health in Chinese adults. *J Am Coll Cardiol* 2015;**65**(10):1013-25.
3. Moran A, Gu D, Zhao D, et al. Future cardiovascular disease in china: markov model and risk factor scenario projections from the coronary heart disease policy model-china. *Circ Cardiovasc Qual Outcomes* 2010;**3**(3):243-52.
4. Yusuf S. Two decades of progress in preventing vascular disease. *The Lancet* 2002;**360**(9326):2-3.
5. Clark AM, Hartling L, Vandermeer B, et al. Secondary prevention programmes for coronary heart disease: a meta-regression showing the merits of shorter, generalist, primary care-based interventions. *Eur J Cardiovasc Prev Rehabil* 2007;**14**(4):538-46.
6. Frederix I, Hansen D, Coninx K, et al. Effect of comprehensive cardiac telerehabilitation on one-year cardiovascular rehospitalization rate, medical costs and quality of life: A cost-effectiveness analysis. *Eur J Prev Cardiol* 2015.
7. Anderson L, Oldridge N, Thompson DR, et al. Exercise-Based Cardiac Rehabilitation for Coronary Heart Disease: Cochrane Systematic Review and Meta-Analysis. *J Am Coll Cardiol* 2016;**67**(1):1-12.
8. Pack QR, Squires RW, Lopez-Jimenez F, et al. Participation Rates, Process Monitoring, and Quality Improvement Among Cardiac Rehabilitation Programs in the United States: A NATIONAL SURVEY. *J Cardiopulm Rehabil Prev* 2015;**35**(3):173-80.
9. Laukkanen JA. Cardiac rehabilitation: why is it an underused therapy? *Eur Heart J* 2015;**36**(24):1500-1.
10. Jelinek MV, Thompson DR, Ski C, et al. 40 years of cardiac rehabilitation and secondary prevention in post-cardiac ischaemic patients. Are we still in the wilderness? *Int J Cardiol* 2015;**179**:153-9.
11. Berry JD. Preventive Cardiology Update: Controversy, Consensus, and Future Promise. *Prog Cardiovasc Dis* 2015.
12. Chew DP, French J, Briffa TG, et al. Acute coronary syndrome care across Australia and New Zealand: the SNAPSHOT ACS study. *Med J Aust* 2013;**199**(3):185-91.
13. Shanmugasagaram S, Perez-Terzic C, Jiang X, et al. Cardiac rehabilitation services in low- and middle-income countries: a scoping review. *J Cardiovasc Nurs* 2014;**29**(5):454-63.
14. Turk-Adawi K, Sarrafzadegan N, Grace SL. Global availability of cardiac rehabilitation. *Nat Rev Cardiol* 2014;**11**(10):586-96.
15. Zhang Z, Pack Q, Squires RW, et al. Availability and characteristics of cardiac rehabilitation programmes in China. *Heart Asia* 2016;**8**(2):9-12.
16. Wang W, Chair SY, Thompson DR, et al. Health care professionals' perceptions of hospital-based cardiac rehabilitation in mainland China: an exploratory study. *J Clin Nurs* 2009;**18**(24):3401-8.
17. Jin H, Wei Q, Chen L, et al. Obstacles and alternative options for cardiac rehabilitation in Nanjing, China: an exploratory study. *BMC Cardiovasc Disord* 2014;**14**:20.
18. Varnfield M, Karunanithi M, Lee CK, et al. Smartphone-based home care model improved use of cardiac rehabilitation in postmyocardial infarction patients: results from a randomised controlled trial. *Heart* 2014;**100**(22):1770-9.
19. Neubeck L, Redfern J, Fernandez R, et al. Telehealth interventions for the secondary prevention of coronary heart disease: a systematic review. *Eur J Cardiovasc Prev Rehabil* 2009;**16**(3):281-9.
20. Rawstorn JC, Gant N, Direito A, et al. Telehealth exercise-based cardiac rehabilitation: a systematic review and meta-analysis. *Heart* 2016.

21. Szalewska D, Zielinski P, Tomaszewski J, et al. Effects of outpatient followed by home-based telemonitored cardiac rehabilitation in patients with coronary artery disease. *Kardiol Pol* 2015;**73**(11):1101-7.
22. Zhao J, Freeman B, Li M. Can Mobile Phone Apps Influence People's Health Behavior Change? An Evidence Review. *J Med Internet Res* 2016;**18**(11):e287.
23. West JH, Belvedere LM, Andreasen R, et al. Controlling Your "App"etite: How Diet and Nutrition-Related Mobile Apps Lead to Behavior Change. *JMIR Mhealth Uhealth* 2017;**5**(7):e95.
24. Pfaeffli Dale L, Whittaker R, Jiang Y, et al. Text Message and Internet Support for Coronary Heart Disease Self-Management: Results From the Text4Heart Randomized Controlled Trial. *J Med Internet Res* 2015;**17**(10):e237.
25. Interlligence P. WeChat 2017 user research and business opportunities insight. Secondary WeChat 2017 user research and business opportunities insight 29 November 2016. <http://tech.qq.com/a/20170424/004233.htm#p=4>.
26. He C, Wu S, Zhao Y, et al. Social Media-Promoted Weight Loss Among an Occupational Population: Cohort Study Using a WeChat Mobile Phone App-Based Campaign. *J Med Internet Res* 2017;**19**(10):e357.
27. Chan AW, Tetzlaff JM, Altman DG, et al. SPIRIT 2013: new guidance for content of clinical trial protocols. *Lancet* 2013;**381**(9861):91-2.
28. Chan AW, Tetzlaff JM, Altman DG, et al. SPIRIT 2013 Statement: defining standard protocol items for clinical trials. *Rev Panam Salud Publica* 2015;**38**(6):506-14.
29. Chan AW, Tetzlaff JM, Gotzsche PC, et al. SPIRIT 2013 explanation and elaboration: guidance for protocols of clinical trials. *Bmj* 2013;**346**:e7586.
30. Casillas JM, Hannequin A, Besson D, et al. Walking tests during the exercise training: specific use for the cardiac rehabilitation. *Ann Phys Rehabil Med* 2013;**56**(7-8):561-75.
31. Gremeaux V, Troisgros O, Benaim S, et al. Determining the minimal clinically important difference for the six-minute walk test and the 200-meter fast-walk test during cardiac rehabilitation program in coronary artery disease patients after acute coronary syndrome. *Arch Phys Med Rehabil* 2011;**92**(4):611-9.
32. Beatty AL, Schiller NB, Whooley MA. Six-minute walk test as a prognostic tool in stable coronary heart disease: data from the heart and soul study. *Arch Intern Med* 2012;**172**(14):1096-102.
33. Woodruffe S, Neubeck L, Clark RA, et al. Australian Cardiovascular Health and Rehabilitation Association (ACRA) core components of cardiovascular disease secondary prevention and cardiac rehabilitation 2014. *Heart Lung Circ* 2015;**24**(5):430-41.
34. Kaminsky LA, Brubaker PH, Guazzi M, et al. Assessing Physical Activity as a Core Component in Cardiac Rehabilitation: A POSITION STATEMENT OF THE AMERICAN ASSOCIATION OF CARDIOVASCULAR AND PULMONARY REHABILITATION. *J Cardiopulm Rehabil Prev* 2016;**36**(4):217-29.
35. Organization WH. Physical status: the use and interpretation of anthropometry Geneva, 1995.
36. Gabb GM, Mangoni AA, Anderson CS, et al. Guideline for the diagnosis and management of hypertension in adults - 2016. *Med J Aust* 2016;**205**(2):85-9.
37. Harris PA, Taylor R, Thielke R, et al. Research electronic data capture (REDCap)--a metadata-driven methodology and workflow process for providing translational research informatics support. *J Biomed Inform* 2009;**42**(2):377-81.
38. Wang SS, Lay S, Yu HN, et al. Dietary Guidelines for Chinese Residents (2016): comments and comparisons. *J Zhejiang Univ Sci B* 2016;**17**(9):649-56.
39. Smith SC, Jr., Benjamin EJ, Bonow RO, et al. AHA/ACCF Secondary Prevention and Risk Reduction Therapy for Patients with Coronary and other Atherosclerotic Vascular Disease: 2011 update: a guideline from the American Heart Association and American College of Cardiology Foundation. *Circulation* 2011;**124**(22):2458-73.

- 1  
2  
3 40. Piepoli MF, Hoes AW, Agewall S, et al. 2016 European Guidelines on cardiovascular disease  
4 prevention in clinical practice: The Sixth Joint Task Force of the European Society of  
5 Cardiology and Other Societies on Cardiovascular Disease Prevention in Clinical Practice  
6 (constituted by representatives of 10 societies and by invited experts)Developed with the  
7 special contribution of the European Association for Cardiovascular Prevention &  
8 Rehabilitation (EACPR). *Eur Heart J* 2016;**37**(29):2315-81.
- 9 41. Singh SJ, Puhan MA, Andrianopoulos V, et al. An official systematic review of the European  
10 Respiratory Society/American Thoracic Society: measurement properties of field walking  
11 tests in chronic respiratory disease. *Eur Respir J* 2014;**44**(6):1447-78.
- 12 42. Chan CW, Lopez V, Chung JW. A survey of coronary heart disease knowledge in a sample of Hong  
13 Kong Chinese. *Asia Pac J Public Health* 2011;**23**(3):288-97.
- 14 43. Wagner J, Lacey K, Chyun D, et al. Development of a questionnaire to measure heart disease risk  
15 knowledge in people with diabetes: the Heart Disease Fact Questionnaire. *Patient Educ*  
16 *Couns* 2005;**58**(1):82-7.
- 17 44. v2.1 WSiCaE. The WHO STEPwise approach to chronic disease risk factor surveillance (STEPS).  
18 Geneva: World Health Organisation 2008.
- 19 45. Heatherton TF, Kozlowski LT, Frecker RC, et al. The Fagerstrom Test for Nicotine Dependence: a  
20 revision of the Fagerstrom Tolerance Questionnaire. *Br J Addict* 1991;**86**(9):1119-27.
- 21 46. Organisation WH. Global Physical Activity Questionnaire (GPAQ) Analysis Guide. Secondary  
22 Global Physical Activity Questionnaire (GPAQ) Analysis Guide 2011.  
23 [http://www.who.int/chp/steps/resources/GPAQ\\_Analysis\\_Guide.pdf](http://www.who.int/chp/steps/resources/GPAQ_Analysis_Guide.pdf).
- 24 47. Spitzer RL, Kroenke K, Williams JB, et al. A brief measure for assessing generalized anxiety  
25 disorder: the GAD-7. *Arch Intern Med* 2006;**166**(10):1092-7.
- 26 48. Kroenke K, Spitzer RL, Williams JB. The PHQ-9: validity of a brief depression severity measure. *J*  
27 *Gen Intern Med* 2001;**16**(9):606-13.
- 28 49. Ware J, Jr., Kosinski M, Keller SD. A 12-Item Short-Form Health Survey: construction of scales and  
29 preliminary tests of reliability and validity. *Med Care* 1996;**34**(3):220-33.
- 30  
31  
32  
33  
34  
35  
36  
37  
38  
39  
40  
41  
42  
43  
44  
45  
46  
47  
48  
49  
50  
51  
52  
53  
54  
55  
56  
57  
58  
59  
60



Figure 1. Randomised controlled trial design and flowchart. The control group will receive usual care but no formal CR/SP. The intervention group will receive a smartphone and WeChat-based CR/SP program providing education and support for risk factor monitoring and modification.

338x190mm (300 x 300 DPI)

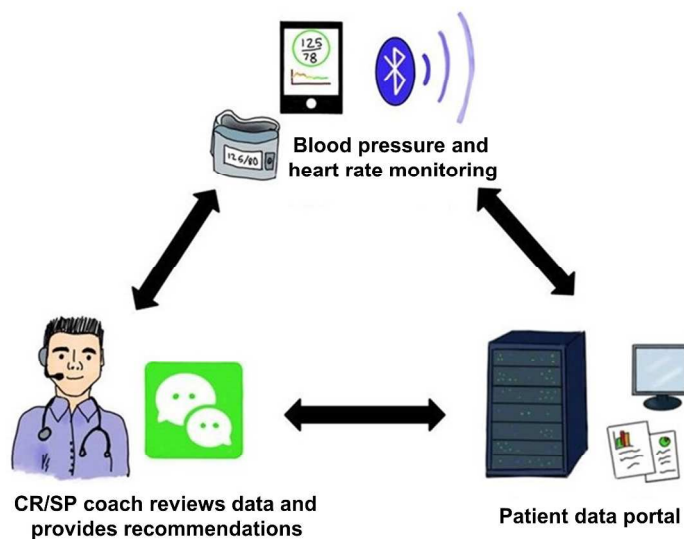

Figure 2. Components of the SMART-CR/SP system: physical activity tracking with interactive feedback and goal setting; education modules addressing disease understanding and self-management; remote blood pressure monitoring and strategies to improve medication adherence. Furthermore, a dedicated data portal and a CR/SP coach will facilitate individualised supervision and counselling.

338x190mm (300 x 300 DPI)

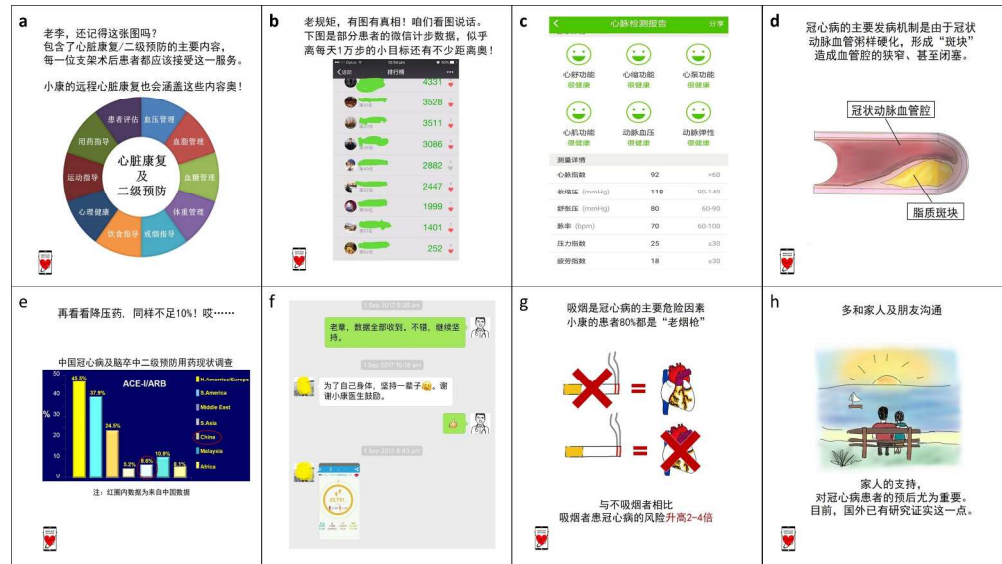

Figure 3. SMART-CR/SP system interface depicting health education(a), physical activity tracking(b), blood pressure monitoring(c), cholesterol management(d), medication management(e), individual counselling(f), smoking secession(g), mental health(h)!! + !! +

338x190mm (300 x 300 DPI)



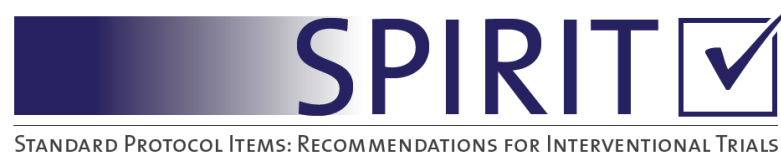

SPIRIT 2013 Checklist: Recommended items to address in a clinical trial protocol and related documents\*

| Section/item                      | Item No | Description                                                                                                                                                                                                                                                                              | Addressed on page number |
|-----------------------------------|---------|------------------------------------------------------------------------------------------------------------------------------------------------------------------------------------------------------------------------------------------------------------------------------------------|--------------------------|
| <b>Administrative information</b> |         |                                                                                                                                                                                                                                                                                          |                          |
| Title                             | 1       | Descriptive title identifying the study design, population, interventions, and, if applicable, trial acronym                                                                                                                                                                             | _____1_____              |
| Trial registration                | 2a      | Trial identifier and registry name. If not yet registered, name of intended registry                                                                                                                                                                                                     | _____3_____              |
|                                   | 2b      | All items from the World Health Organization Trial Registration Data Set                                                                                                                                                                                                                 | _____3_____              |
| Protocol version                  | 3       | Date and version identifier                                                                                                                                                                                                                                                              | _____17_____             |
| Funding                           | 4       | Sources and types of financial, material, and other support                                                                                                                                                                                                                              | _____16_____             |
| Roles and responsibilities        | 5a      | Names, affiliations, and roles of protocol contributors                                                                                                                                                                                                                                  | _____1 & 16_____         |
|                                   | 5b      | Name and contact information for the trial sponsor                                                                                                                                                                                                                                       | _____16_____             |
|                                   | 5c      | Role of study sponsor and funders, if any, in study design; collection, management, analysis, and interpretation of data; writing of the report; and the decision to submit the report for publication, including whether they will have ultimate authority over any of these activities | _____16_____             |
|                                   | 5d      | Composition, roles, and responsibilities of the coordinating centre, steering committee, endpoint adjudication committee, data management team, and other individuals or groups overseeing the trial, if applicable (see Item 21a for data monitoring committee)                         | _____NA_____             |

1  
2  
3  
4  
5  
6  
7  
8  
9  
10  
11  
12  
13  
14  
15  
16  
17  
18  
19  
20  
21  
22  
23  
24  
25  
26  
27  
28  
29  
30  
31  
32  
33  
34  
35  
36  
37  
38  
39  
40  
41  
42  
43  
44  
45  
46  
47

## Introduction

|                          |    |                                                                                                                                                                                                           |               |
|--------------------------|----|-----------------------------------------------------------------------------------------------------------------------------------------------------------------------------------------------------------|---------------|
| Background and rationale | 6a | Description of research question and justification for undertaking the trial, including summary of relevant studies (published and unpublished) examining benefits and harms for each intervention        | _____5-6_____ |
|                          | 6b | Explanation for choice of comparators                                                                                                                                                                     | _____6_____   |
| Objectives               | 7  | Specific objectives or hypotheses                                                                                                                                                                         | _____6_____   |
| Trial design             | 8  | Description of trial design including type of trial (eg, parallel group, crossover, factorial, single group), allocation ratio, and framework (eg, superiority, equivalence, noninferiority, exploratory) | _____6_____   |

## Methods: Participants, interventions, and outcomes

|                      |     |                                                                                                                                                                                                                                                                                                                                                                                |              |
|----------------------|-----|--------------------------------------------------------------------------------------------------------------------------------------------------------------------------------------------------------------------------------------------------------------------------------------------------------------------------------------------------------------------------------|--------------|
| Study setting        | 9   | Description of study settings (eg, community clinic, academic hospital) and list of countries where data will be collected. Reference to where list of study sites can be obtained                                                                                                                                                                                             | _____7_____  |
| Eligibility criteria | 10  | Inclusion and exclusion criteria for participants. If applicable, eligibility criteria for study centres and individuals who will perform the interventions (eg, surgeons, psychotherapists)                                                                                                                                                                                   | _____7_____  |
| Interventions        | 11a | Interventions for each group with sufficient detail to allow replication, including how and when they will be administered                                                                                                                                                                                                                                                     | _____9_____  |
|                      | 11b | Criteria for discontinuing or modifying allocated interventions for a given trial participant (eg, drug dose change in response to harms, participant request, or improving/worsening disease)                                                                                                                                                                                 | _____NA_____ |
|                      | 11c | Strategies to improve adherence to intervention protocols, and any procedures for monitoring adherence (eg, drug tablet return, laboratory tests)                                                                                                                                                                                                                              | _____9_____  |
|                      | 11d | Relevant concomitant care and interventions that are permitted or prohibited during the trial                                                                                                                                                                                                                                                                                  | _____NA_____ |
| Outcomes             | 12  | Primary, secondary, and other outcomes, including the specific measurement variable (eg, systolic blood pressure), analysis metric (eg, change from baseline, final value, time to event), method of aggregation (eg, median, proportion), and time point for each outcome. Explanation of the clinical relevance of chosen efficacy and harm outcomes is strongly recommended | _____12_____ |
| Participant timeline | 13  | Time schedule of enrolment, interventions (including any run-ins and washouts), assessments, and visits for participants. A schematic diagram is highly recommended (see Figure)                                                                                                                                                                                               | _____12_____ |

1  
2  
3 Sample size 14 Estimated number of participants needed to achieve study objectives and how it was determined, including \_\_\_\_\_7\_\_\_\_\_

4 clinical and statistical assumptions supporting any sample size calculations  
5  
6 Recruitment 15 Strategies for achieving adequate participant enrolment to reach target sample size \_\_\_\_\_8\_\_\_\_\_

7  
8 **Methods: Assignment of interventions (for controlled trials)**

9  
10 Allocation:

11 Sequence generation 16a Method of generating the allocation sequence (eg, computer-generated random numbers), and list of any \_\_\_\_\_8\_\_\_\_\_

12 factors for stratification. To reduce predictability of a random sequence, details of any planned restriction  
13 (eg, blocking) should be provided in a separate document that is unavailable to those who enrol participants  
14 or assign interventions  
15  
16 Allocation concealment mechanism 16b Mechanism of implementing the allocation sequence (eg, central telephone; sequentially numbered, \_\_\_\_\_9\_\_\_\_\_

17 opaque, sealed envelopes), describing any steps to conceal the sequence until interventions are assigned  
18  
19 Implementation 16c Who will generate the allocation sequence, who will enrol participants, and who will assign participants to \_\_\_\_\_8-9\_\_\_\_\_

20  
21 Blinding (masking) 17a Who will be blinded after assignment to interventions (eg, trial participants, care providers, outcome \_\_\_\_\_8-9\_\_\_\_\_

22 assessors, data analysts), and how  
23  
24 17b If blinded, circumstances under which unblinding is permissible, and procedure for revealing a participant's \_\_\_\_\_8-9\_\_\_\_\_

25  
26  
27  
28  
29  
30  
31 **Methods: Data collection, management, and analysis**

32  
33 Data collection methods 18a Plans for assessment and collection of outcome, baseline, and other trial data, including any related \_\_\_\_\_11\_\_\_\_\_

34 processes to promote data quality (eg, duplicate measurements, training of assessors) and a description of  
35 study instruments (eg, questionnaires, laboratory tests) along with their reliability and validity, if known.  
36 Reference to where data collection forms can be found, if not in the protocol  
37  
38 18b Plans to promote participant retention and complete follow-up, including list of any outcome data to be \_\_\_\_\_14\_\_\_\_\_

39 collected for participants who discontinue or deviate from intervention protocols  
40  
41  
42  
43  
44  
45  
46  
47

1  
2  
3  
4  
5  
6  
7  
8  
9  
10  
11  
12  
13  
14  
15  
16  
17  
18  
19  
20  
21  
22  
23  
24  
25  
26  
27  
28  
29  
30  
31  
32  
33  
34  
35  
36  
37  
38  
39  
40  
41  
42  
43  
44  
45  
46  
47

Data management 19 Plans for data entry, coding, security, and storage, including any related processes to promote data quality (eg, double data entry; range checks for data values). Reference to where details of data management procedures can be found, if not in the protocol \_\_\_\_\_14\_\_\_\_\_

Statistical methods 20a Statistical methods for analysing primary and secondary outcomes. Reference to where other details of the statistical analysis plan can be found, if not in the protocol \_\_\_\_\_14\_\_\_\_\_

20b Methods for any additional analyses (eg, subgroup and adjusted analyses) \_\_\_\_\_14\_\_\_\_\_

20c Definition of analysis population relating to protocol non-adherence (eg, as randomised analysis), and any statistical methods to handle missing data (eg, multiple imputation) \_\_\_\_\_14\_\_\_\_\_

**Methods: Monitoring**

Data monitoring 21a Composition of data monitoring committee (DMC); summary of its role and reporting structure; statement of whether it is independent from the sponsor and competing interests; and reference to where further details about its charter can be found, if not in the protocol. Alternatively, an explanation of why a DMC is not needed \_\_\_\_\_14\_\_\_\_\_

21b Description of any interim analyses and stopping guidelines, including who will have access to these interim results and make the final decision to terminate the trial \_\_\_\_\_14\_\_\_\_\_

Harms 22 Plans for collecting, assessing, reporting, and managing solicited and spontaneously reported adverse events and other unintended effects of trial interventions or trial conduct \_\_\_\_\_14\_\_\_\_\_

Auditing 23 Frequency and procedures for auditing trial conduct, if any, and whether the process will be independent from investigators and the sponsor \_\_\_\_\_NA\_\_\_\_\_

**Ethics and dissemination**

Research ethics approval 24 Plans for seeking research ethics committee/institutional review board (REC/IRB) approval \_\_\_\_\_16-17\_\_\_\_\_

Protocol amendments 25 Plans for communicating important protocol modifications (eg, changes to eligibility criteria, outcomes, analyses) to relevant parties (eg, investigators, REC/IRBs, trial participants, trial registries, journals, regulators) \_\_\_\_\_16-17\_\_\_\_\_

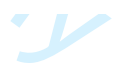

|    |                               |     |                                                                                                                                                                                                                                                                                     |                 |
|----|-------------------------------|-----|-------------------------------------------------------------------------------------------------------------------------------------------------------------------------------------------------------------------------------------------------------------------------------------|-----------------|
| 1  |                               |     |                                                                                                                                                                                                                                                                                     |                 |
| 2  |                               |     |                                                                                                                                                                                                                                                                                     |                 |
| 3  | Consent or assent             | 26a | Who will obtain informed consent or assent from potential trial participants or authorised surrogates, and how (see Item 32)                                                                                                                                                        | ____ 16-17 ____ |
| 4  |                               |     |                                                                                                                                                                                                                                                                                     |                 |
| 5  |                               |     |                                                                                                                                                                                                                                                                                     |                 |
| 6  |                               | 26b | Additional consent provisions for collection and use of participant data and biological specimens in ancillary studies, if applicable                                                                                                                                               | ____ NA ____    |
| 7  |                               |     |                                                                                                                                                                                                                                                                                     |                 |
| 8  | Confidentiality               | 27  | How personal information about potential and enrolled participants will be collected, shared, and maintained in order to protect confidentiality before, during, and after the trial                                                                                                | ____ 14 ____    |
| 9  |                               |     |                                                                                                                                                                                                                                                                                     |                 |
| 10 |                               |     |                                                                                                                                                                                                                                                                                     |                 |
| 11 | Declaration of interests      | 28  | Financial and other competing interests for principal investigators for the overall trial and each study site                                                                                                                                                                       | ____ 16 ____    |
| 12 |                               |     |                                                                                                                                                                                                                                                                                     |                 |
| 13 |                               |     |                                                                                                                                                                                                                                                                                     |                 |
| 14 | Access to data                | 29  | Statement of who will have access to the final trial dataset, and disclosure of contractual agreements that limit such access for investigators                                                                                                                                     | ____ 14 ____    |
| 15 |                               |     |                                                                                                                                                                                                                                                                                     |                 |
| 16 |                               |     |                                                                                                                                                                                                                                                                                     |                 |
| 17 | Ancillary and post-trial care | 30  | Provisions, if any, for ancillary and post-trial care, and for compensation to those who suffer harm from trial participation                                                                                                                                                       | ____ NA ____    |
| 18 |                               |     |                                                                                                                                                                                                                                                                                     |                 |
| 19 |                               |     |                                                                                                                                                                                                                                                                                     |                 |
| 20 | Dissemination policy          | 31a | Plans for investigators and sponsor to communicate trial results to participants, healthcare professionals, the public, and other relevant groups (eg, via publication, reporting in results databases, or other data sharing arrangements), including any publication restrictions | ____ 17 ____    |
| 21 |                               |     |                                                                                                                                                                                                                                                                                     |                 |
| 22 |                               |     |                                                                                                                                                                                                                                                                                     |                 |
| 23 |                               |     |                                                                                                                                                                                                                                                                                     |                 |
| 24 |                               |     |                                                                                                                                                                                                                                                                                     |                 |
| 25 |                               | 31b | Authorship eligibility guidelines and any intended use of professional writers                                                                                                                                                                                                      | ____ NA ____    |
| 26 |                               |     |                                                                                                                                                                                                                                                                                     |                 |
| 27 |                               | 31c | Plans, if any, for granting public access to the full protocol, participant-level dataset, and statistical code                                                                                                                                                                     | ____ NA ____    |
| 28 |                               |     |                                                                                                                                                                                                                                                                                     |                 |
| 29 | <b>Appendices</b>             |     |                                                                                                                                                                                                                                                                                     |                 |
| 30 |                               |     |                                                                                                                                                                                                                                                                                     |                 |
| 31 | Informed consent materials    | 32  | Model consent form and other related documentation given to participants and authorised surrogates                                                                                                                                                                                  | ____ NA ____    |
| 32 |                               |     |                                                                                                                                                                                                                                                                                     |                 |
| 33 |                               |     |                                                                                                                                                                                                                                                                                     |                 |
| 34 | Biological specimens          | 33  | Plans for collection, laboratory evaluation, and storage of biological specimens for genetic or molecular analysis in the current trial and for future use in ancillary studies, if applicable                                                                                      | ____ NA ____    |
| 35 |                               |     |                                                                                                                                                                                                                                                                                     |                 |
| 36 |                               |     |                                                                                                                                                                                                                                                                                     |                 |

37 \*It is strongly recommended that this checklist be read in conjunction with the SPIRIT 2013 Explanation & Elaboration for important clarification on the items.  
 38 Amendments to the protocol should be tracked and dated. The SPIRIT checklist is copyrighted by the SPIRIT Group under the Creative Commons  
 39 "[Attribution-NonCommercial-NoDerivs 3.0 Unported](https://creativecommons.org/licenses/by-nc-nd/3.0/)" license.  
 40
